# Supplementary material for: Evaluating simplifications of subsurface process representations for field-scale permafrost hydrology models
Source: Copernicus journal article supplement (doi:10.5194/tc-16-4141-2022), 2022-10-10
Supplement: Supplementary file 1 [file tc-16-4141-2022-supplement.zip]

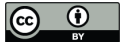

## *Supplement of*

# **Evaluating simplifications of subsurface process representations for field-scale permafrost hydrology models**

**Bo Gao and Ethan T. Coon**

*Correspondence to:* Ethan T. Coon (coonet@ornl.gov)

- tc-16-4141-2022-supplement-title-page.pdf
- Barrow
  - .DS\_Store
  - advection\_column\_barrow.png
  - advection\_north\_convergent\_barrow.png
  - advection\_north\_divergent\_barrow.png
  - advection\_south\_convergent\_barrow.png
  - advection\_south\_divergent\_barrow.png
  - cryosuction\_north\_convergent\_barrow.png
  - cryosuction\_north\_divergent\_barrow.png
  - cryosuction\_south\_convergent\_barrow.png
  - cryosuction\_south\_divergent\_barrow.png
  - density\_column\_barrow.png
  - density\_north\_convergent\_barrow.png
  - density\_north\_divergent\_barrow.png
  - density\_south\_convergent\_barrow.png
  - density\_south\_divergent\_barrow.png
- Sag
  - .DS\_Store
  - advection\_column\_sag.png
  - advection\_north\_convergent\_sag.png
  - advection\_north\_divergent\_sag.png
  - advection\_south\_convergent\_sag.png
  - advection\_south\_divergent\_sag.png

- cryosuction\_north\_convergent\_sag.png
  - cryosuction\_north\_divergent\_sag.png
  - cryosuction\_south\_convergent\_sag.png
  - cryosuction\_south\_divergent\_sag.png
  - density\_north\_convergent\_sag.png
  - density\_north\_divergent\_sag.png
  - density\_south\_convergent\_sag.png
  - density\_south\_divergent\_sag.png
- Supplement\_specification.pdf
- Teller
  - advection\_column\_teller.png
  - advection\_north\_convergent\_teller.png
  - advection\_north\_divergent\_teller.png
  - advection\_south\_convergent\_teller.png
  - advection\_south\_divergent\_teller.png
  - cryosuction\_north\_convergent\_teller.png
  - cryosuction\_north\_divergent\_teller.png
  - cryosuction\_south\_convergent\_teller.png
  - cryosuction\_south\_divergent\_teller.png
  - density\_column\_teller.png
  - density\_north\_convergent\_teller.png
  - density\_north\_divergent\_teller.png
  - density\_south\_convergent\_teller.png
  - density\_south\_divergent\_teller.png

The copyright of individual parts of the supplement might differ from the article licence.
