# Supplementary material for: Evaluating simplifications of subsurface process representations for field-scale permafrost hydrology models
Source: Copernicus journal article supplement (doi:10.5194/tc-16-4141-2022), 2022-10-10
Supplement: Supplementary file 2 [file tc-16-4141-2022-supplement.zip]

Archive with 48 entries (45 files):
- tc-16-4141-2022-supplement-title-page.pdf
- Sag/
- Sag/.DS_Store
- Sag/advection_south_divergent_sag.png
- Sag/density_north_divergent_sag.png
- Sag/advection_column_sag.png
- Sag/density_south_convergent_sag.png
- Sag/cryosuction_north_convergent_sag.png
- Sag/advection_south_convergent_sag.png
- Sag/density_north_convergent_sag.png
- Sag/density_south_divergent_sag.png
- Sag/advection_north_divergent_sag.png
- Sag/advection_north_convergent_sag.png
- Sag/cryosuction_south_convergent_sag.png
- Sag/cryosuction_north_divergent_sag.png
- Sag/cryosuction_south_divergent_sag.png
- Supplement_specification.pdf
- Teller/
- Teller/advection_south_convergent_teller.png
- Teller/cryosuction_north_divergent_teller.png
- Teller/cryosuction_north_convergent_teller.png
- Teller/advection_south_divergent_teller.png
- Teller/density_column_teller.png
- Teller/cryosuction_south_divergent_teller.png
- Teller/density_south_divergent_teller.png
- Teller/advection_column_teller.png
- Teller/density_north_divergent_teller.png
- Teller/density_south_convergent_teller.png
- Teller/advection_north_divergent_teller.png
- Teller/advection_north_convergent_teller.png
- Teller/cryosuction_south_convergent_teller.png
- Teller/density_north_convergent_teller.png
- Barrow/
- Barrow/.DS_Store
- Barrow/advection_column_barrow.png
- Barrow/density_south_divergent_barrow.png
- Barrow/cryosuction_south_convergent_barrow.png
- Barrow/advection_north_convergent_barrow.png
- Barrow/density_column_barrow.png
- Barrow/density_south_convergent_barrow.png
- Barrow/density_north_divergent_barrow.png
- Barrow/advection_south_divergent_barrow.png
- Barrow/density_north_convergent_barrow.png
- Barrow/cryosuction_north_convergent_barrow.png
- Barrow/cryosuction_south_divergent_barrow.png
- Barrow/cryosuction_north_divergent_barrow.png
- Barrow/advection_north_divergent_barrow.png
- Barrow/advection_south_convergent_barrow.png
