# Supplementary figures and images for: Evaluating simplifications of subsurface process representations for field-scale permafrost hydrology models
Source: Copernicus journal article supplement (doi:10.5194/tc-16-4141-2022), 2022-10-10

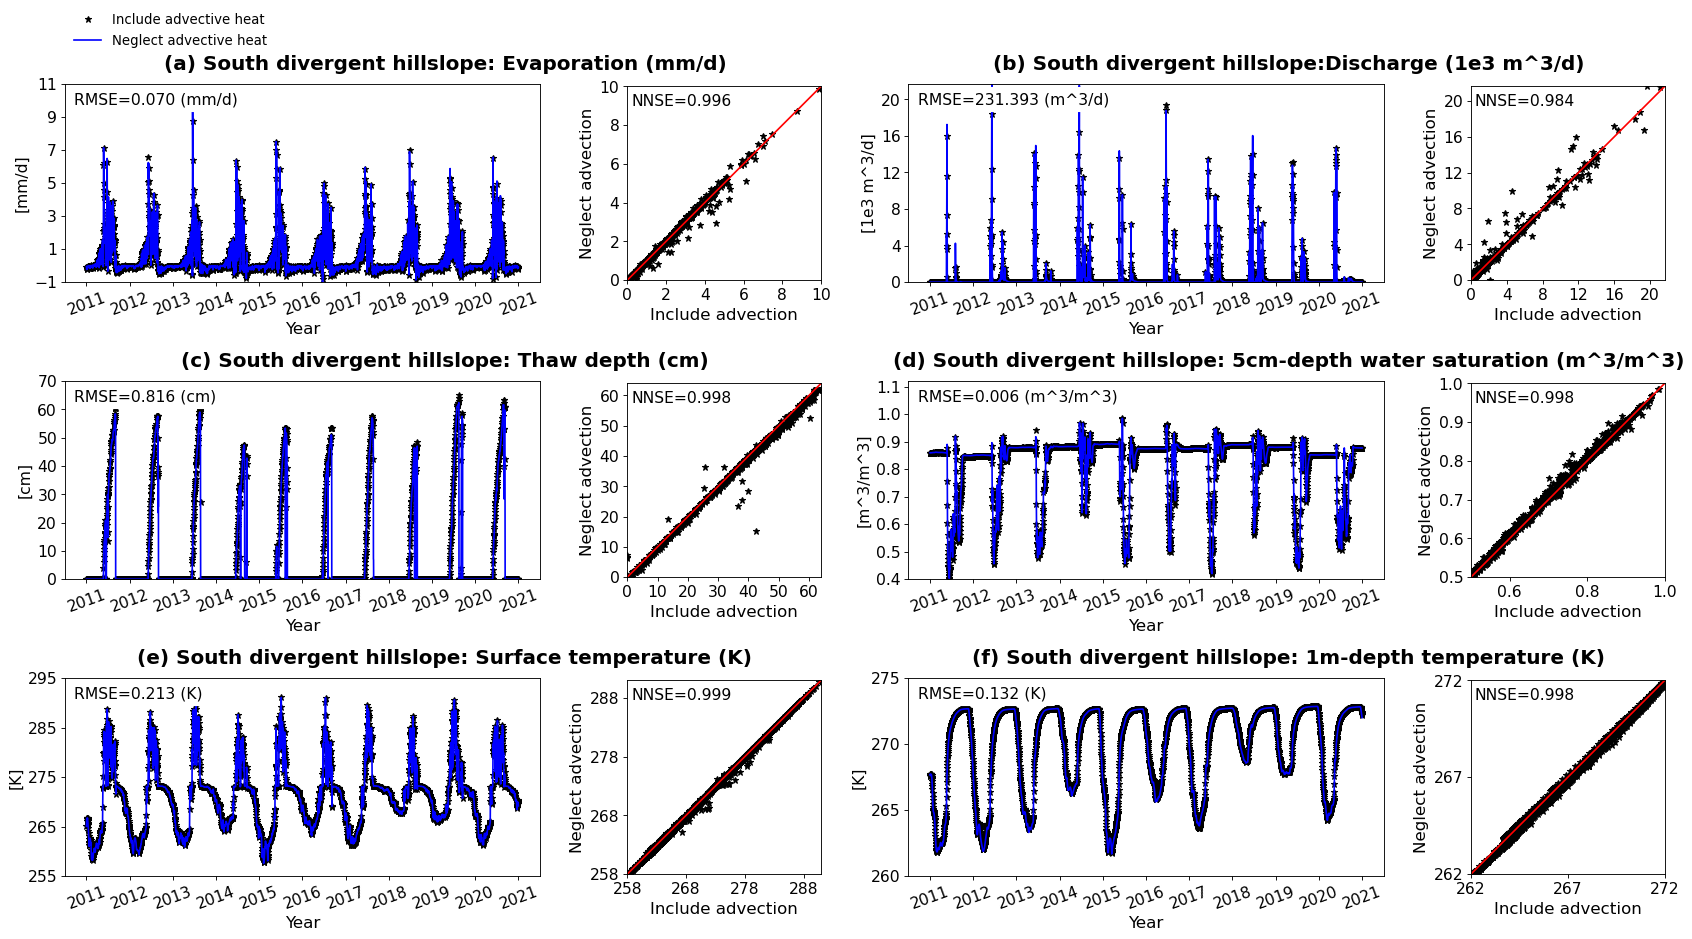

Supplement: Supplementary file 2 [file tc-16-4141-2022-supplement.zip › Sag/advection_south_divergent_sag.png]

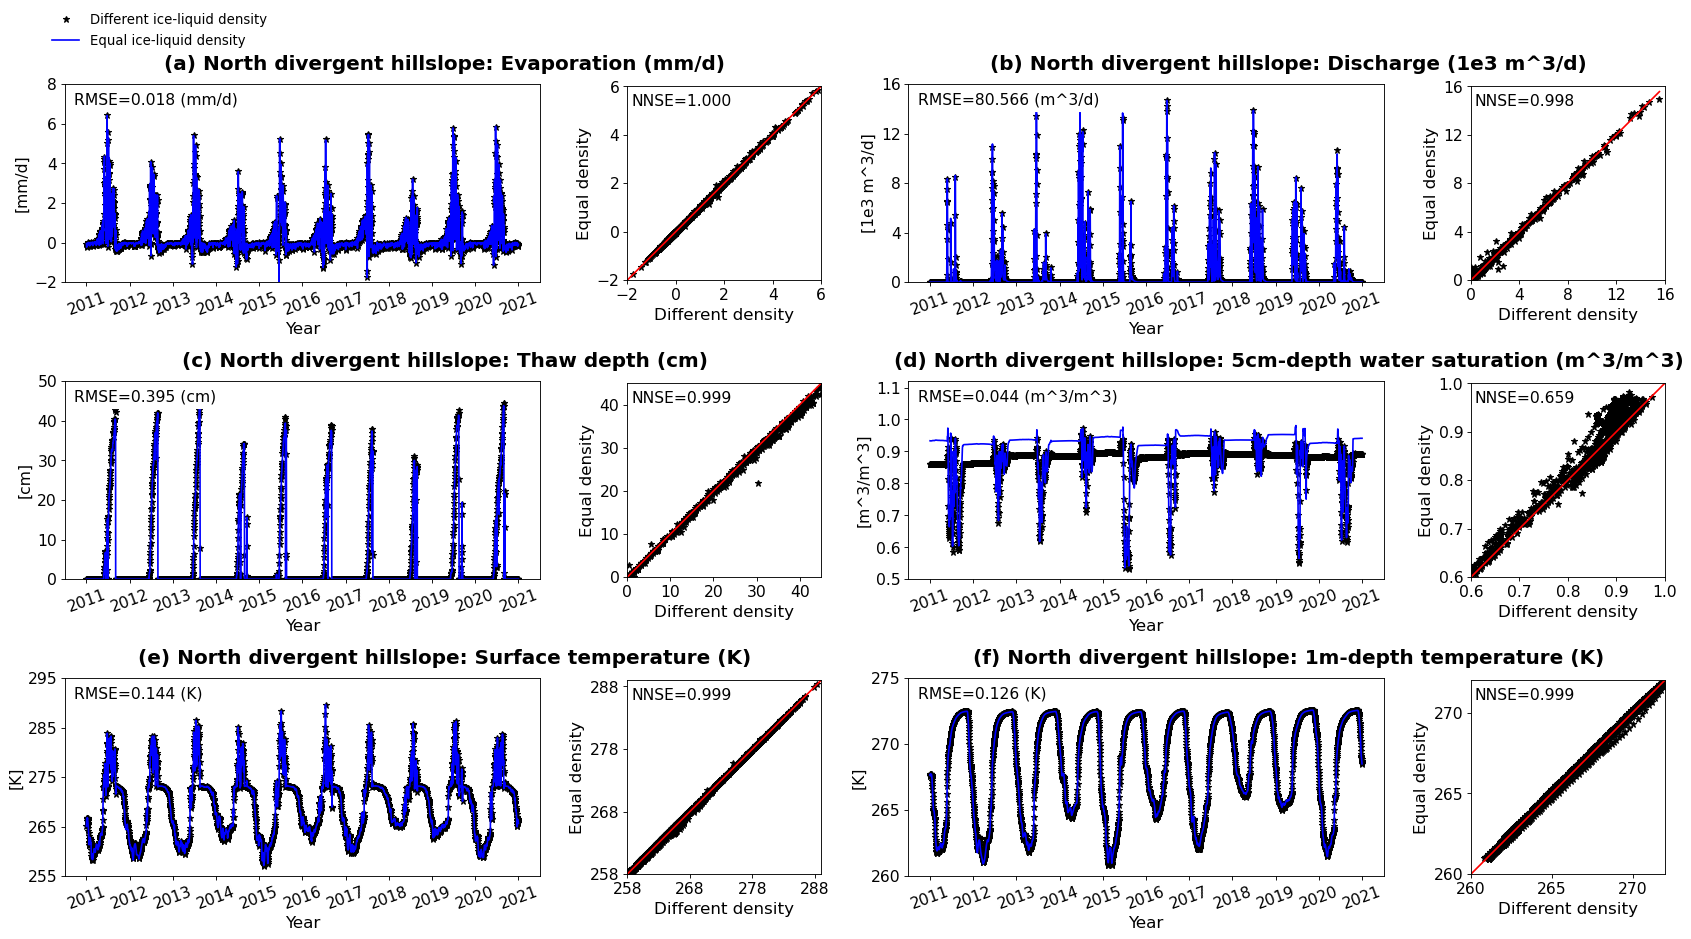

Supplement: Supplementary file 2 [file tc-16-4141-2022-supplement.zip › Sag/density_north_divergent_sag.png]

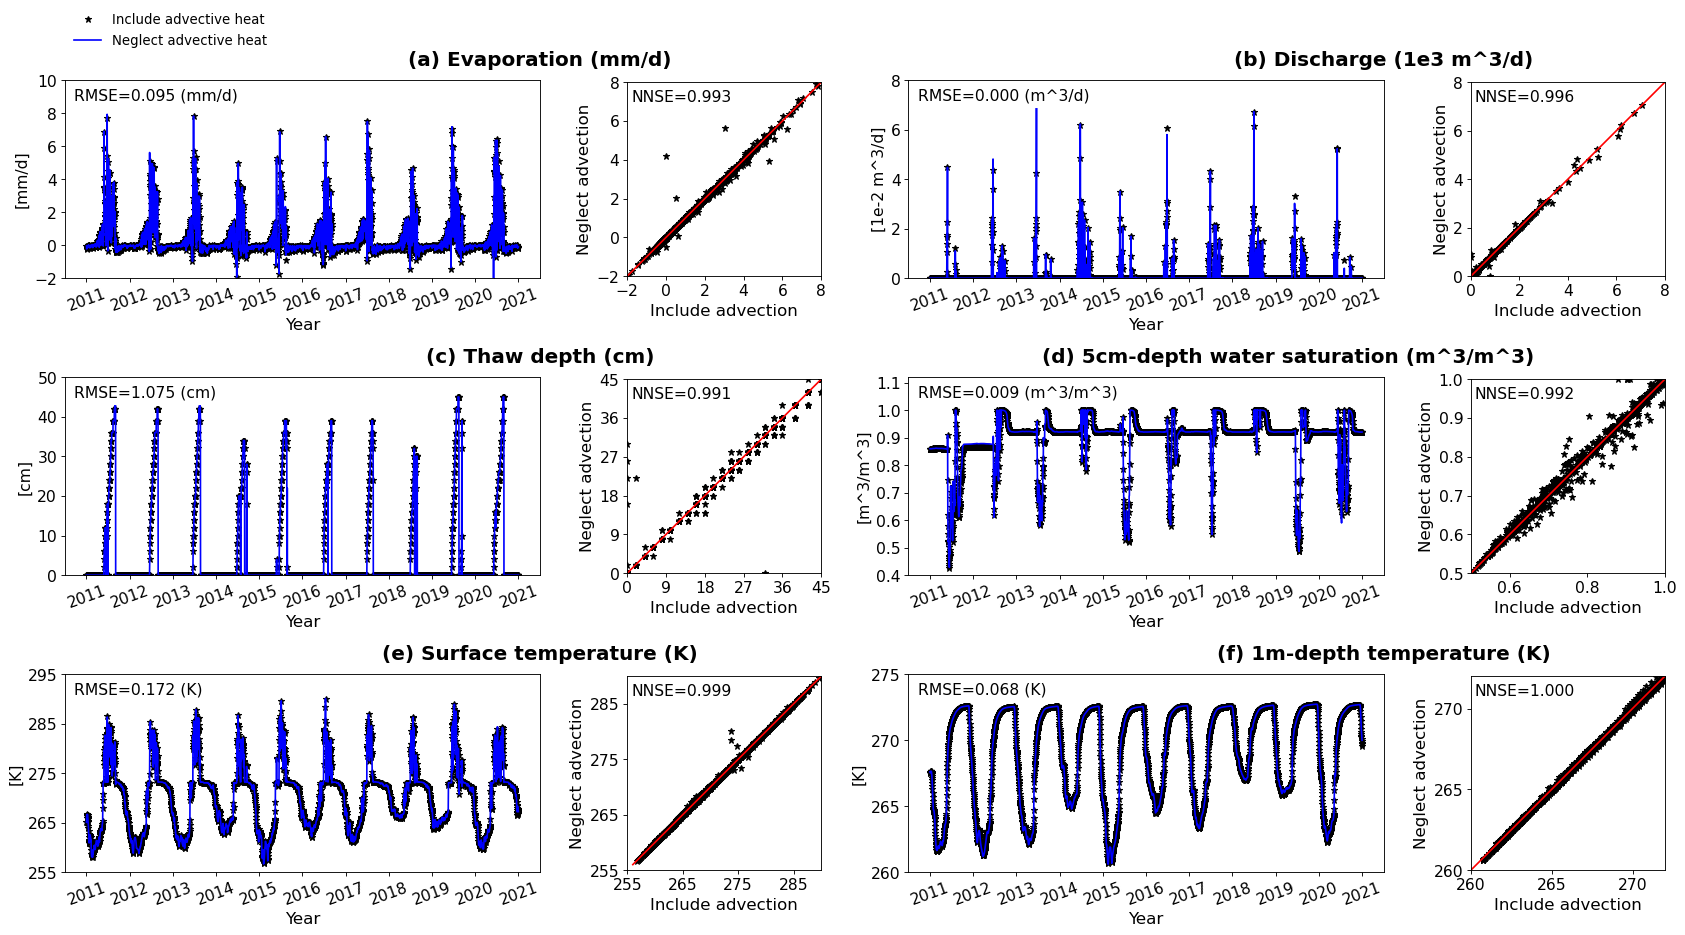

Supplement: Supplementary file 2 [file tc-16-4141-2022-supplement.zip › Sag/advection_column_sag.png]

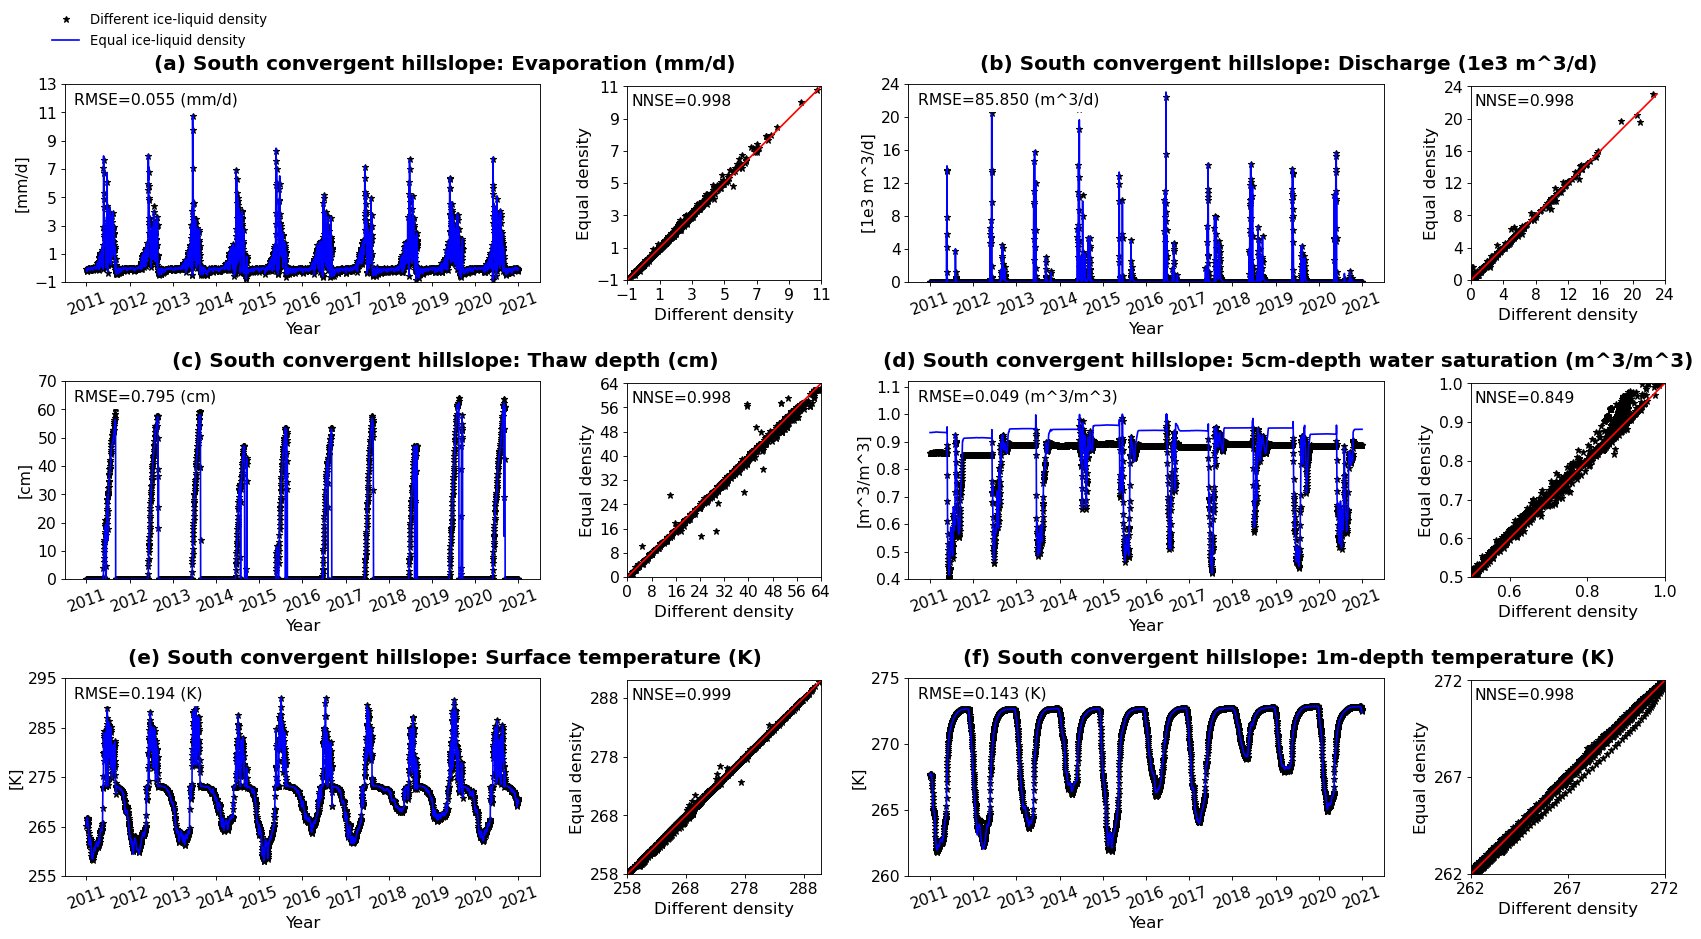

Supplement: Supplementary file 2 [file tc-16-4141-2022-supplement.zip › Sag/density_south_convergent_sag.png]

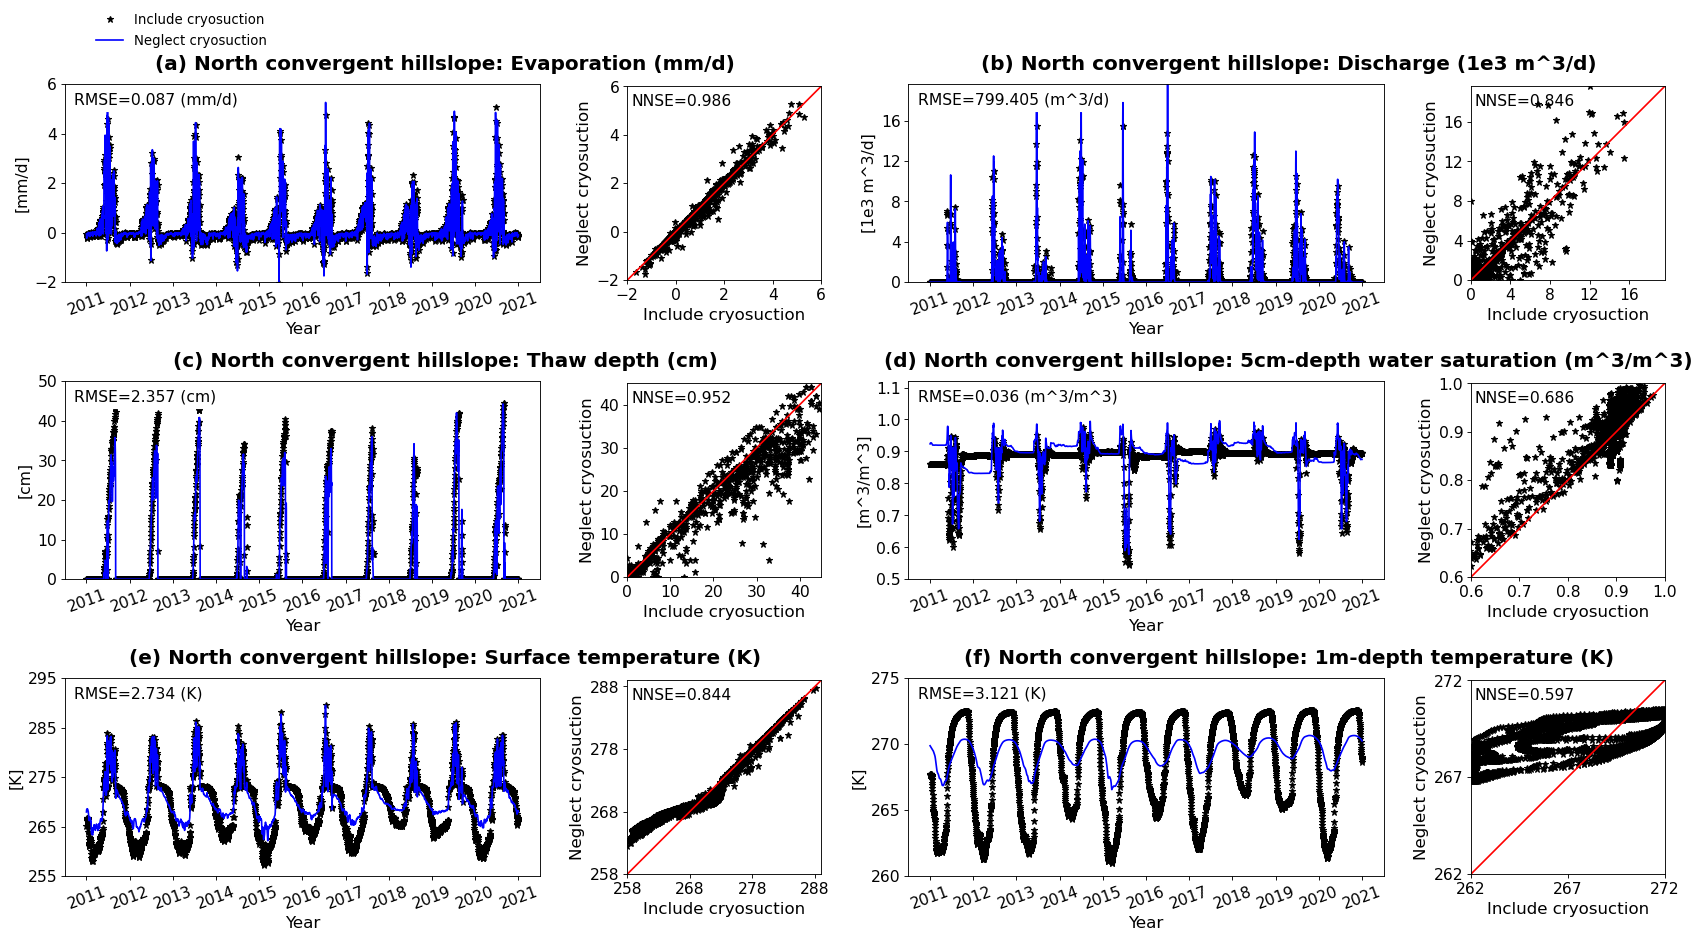

Supplement: Supplementary file 2 [file tc-16-4141-2022-supplement.zip › Sag/cryosuction_north_convergent_sag.png]

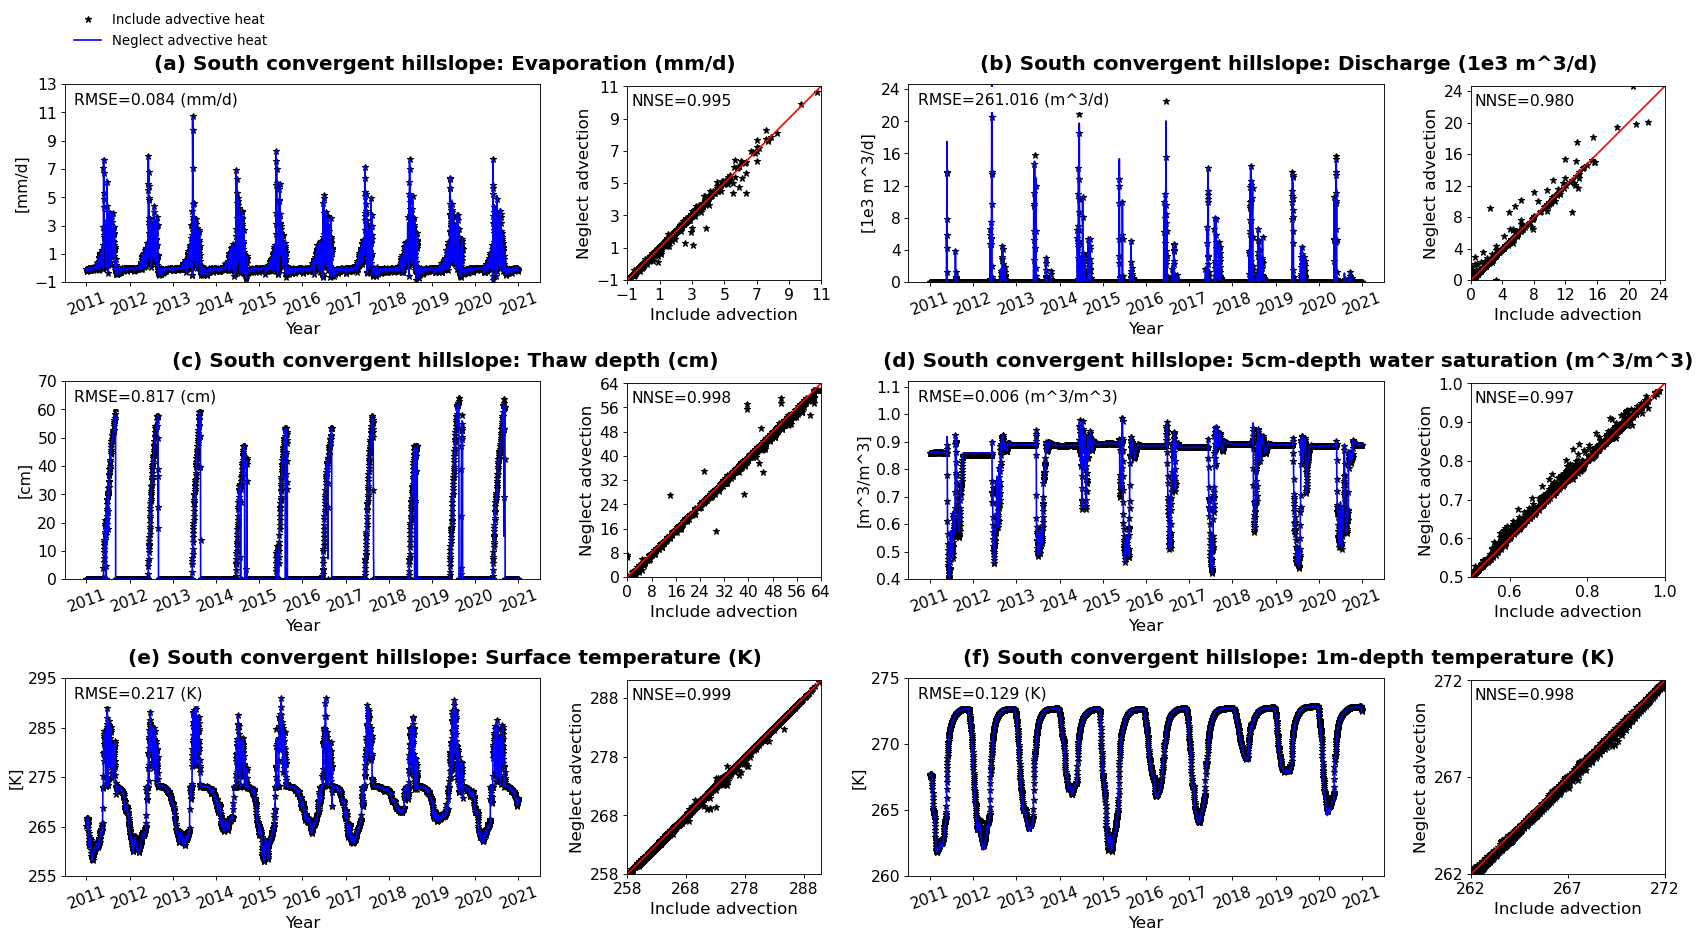

Supplement: Supplementary file 2 [file tc-16-4141-2022-supplement.zip › Sag/advection_south_convergent_sag.png]

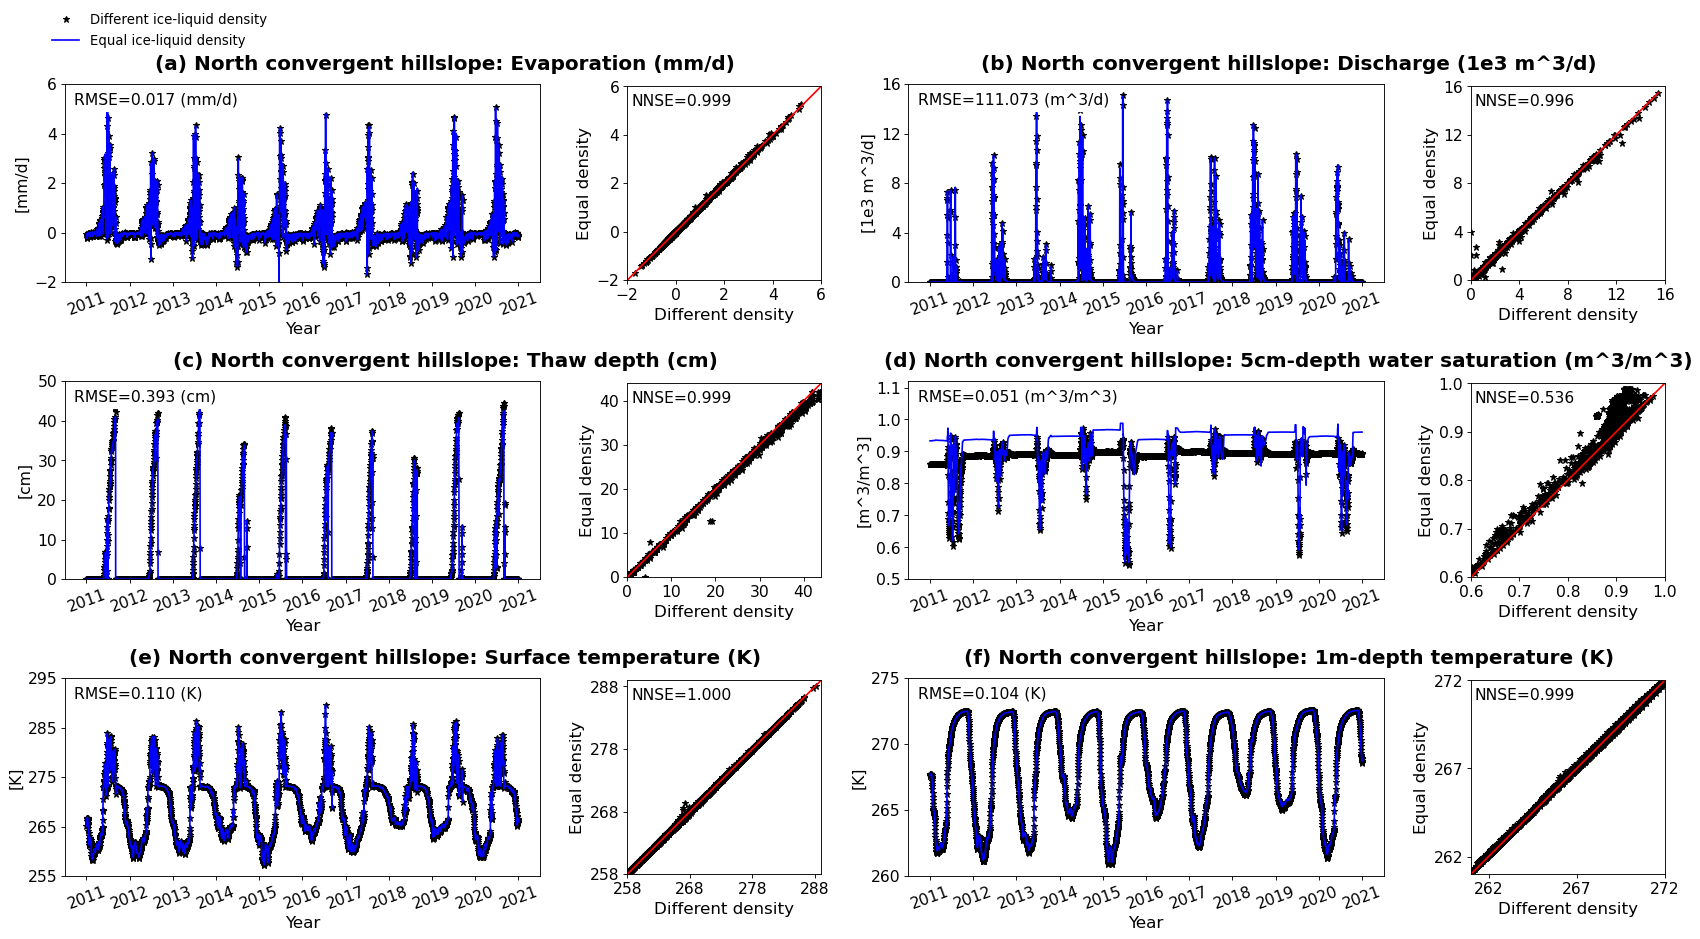

Supplement: Supplementary file 2 [file tc-16-4141-2022-supplement.zip › Sag/density_north_convergent_sag.png]

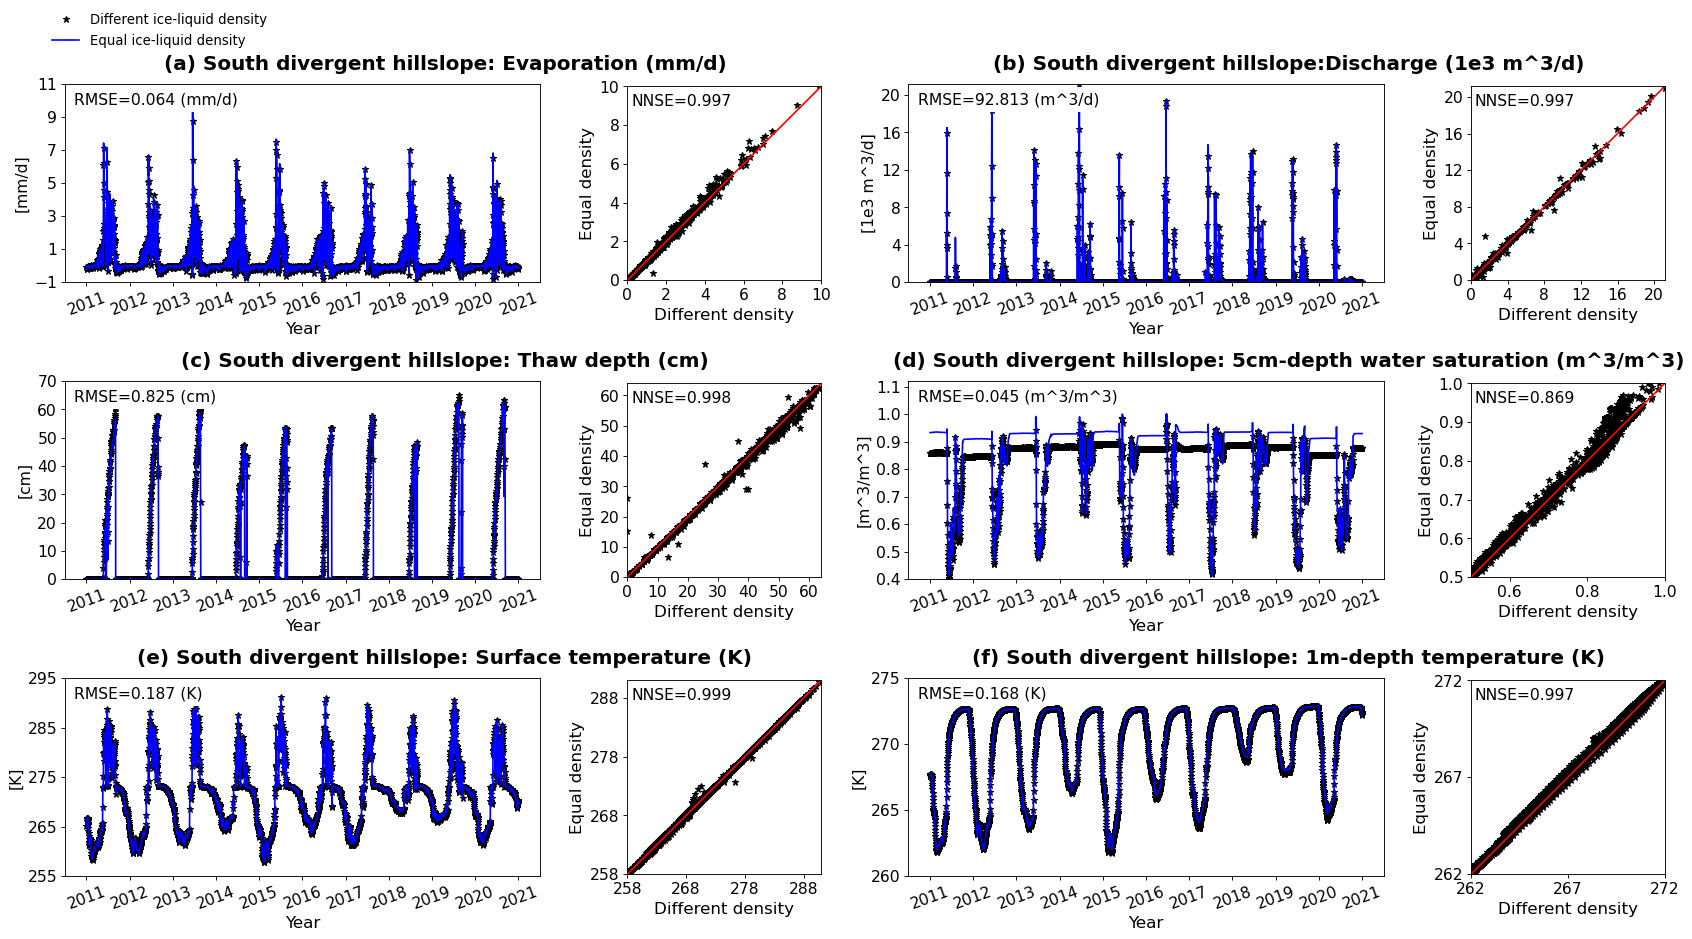

Supplement: Supplementary file 2 [file tc-16-4141-2022-supplement.zip › Sag/density_south_divergent_sag.png]

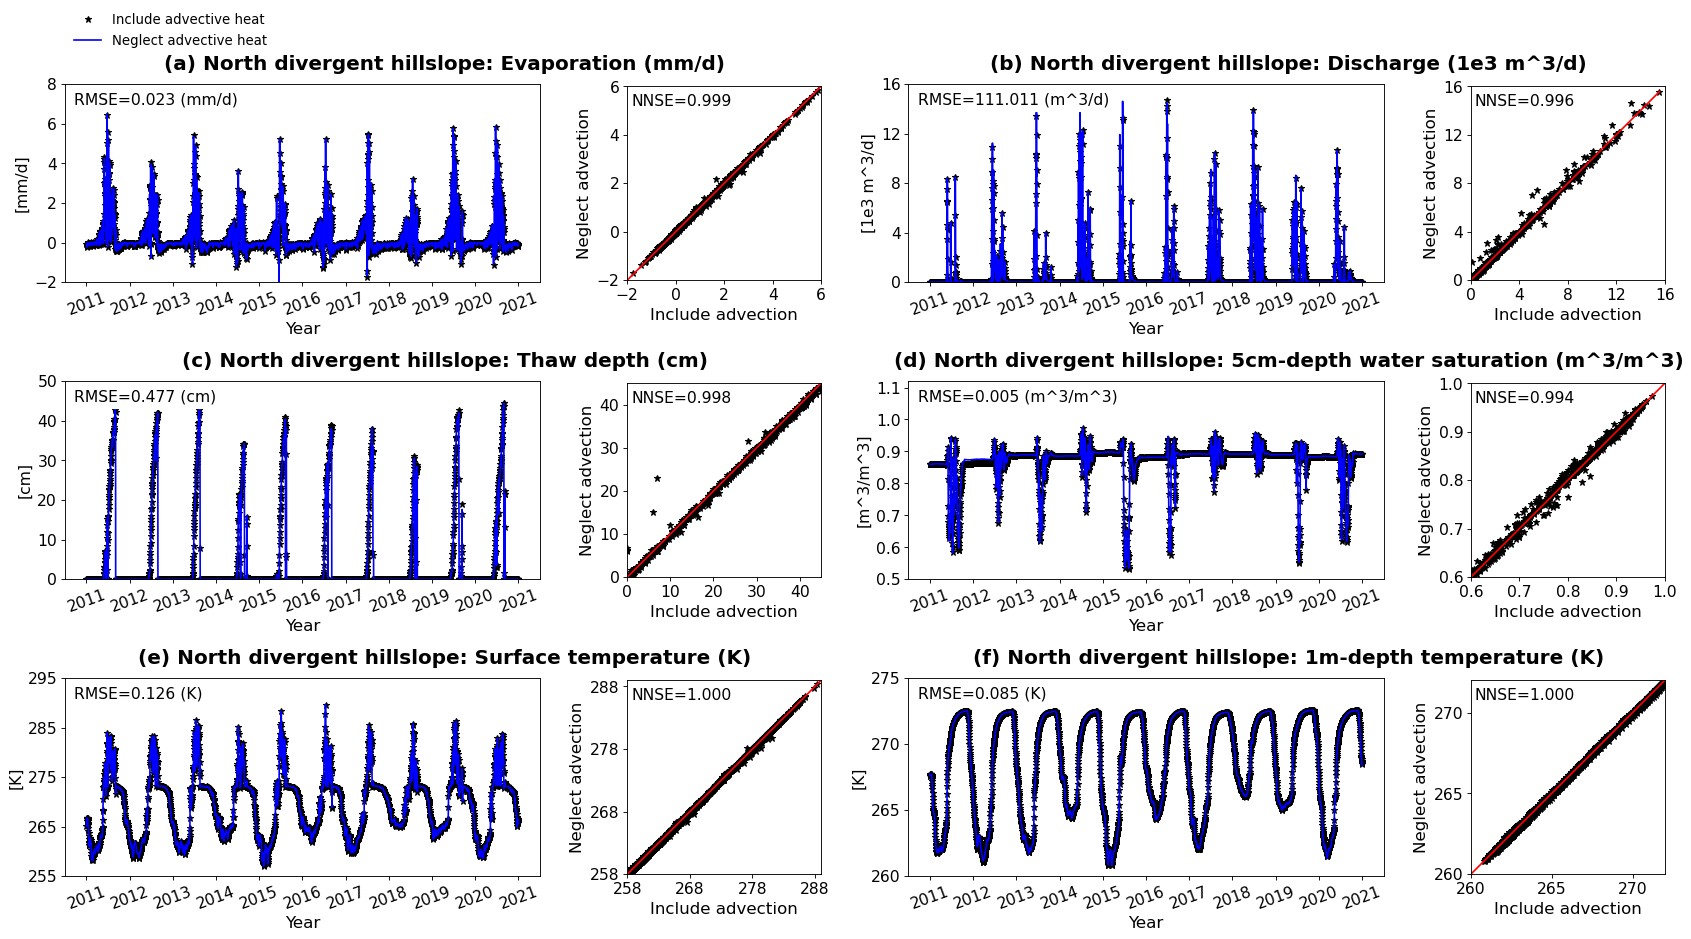

Supplement: Supplementary file 2 [file tc-16-4141-2022-supplement.zip › Sag/advection_north_divergent_sag.png]

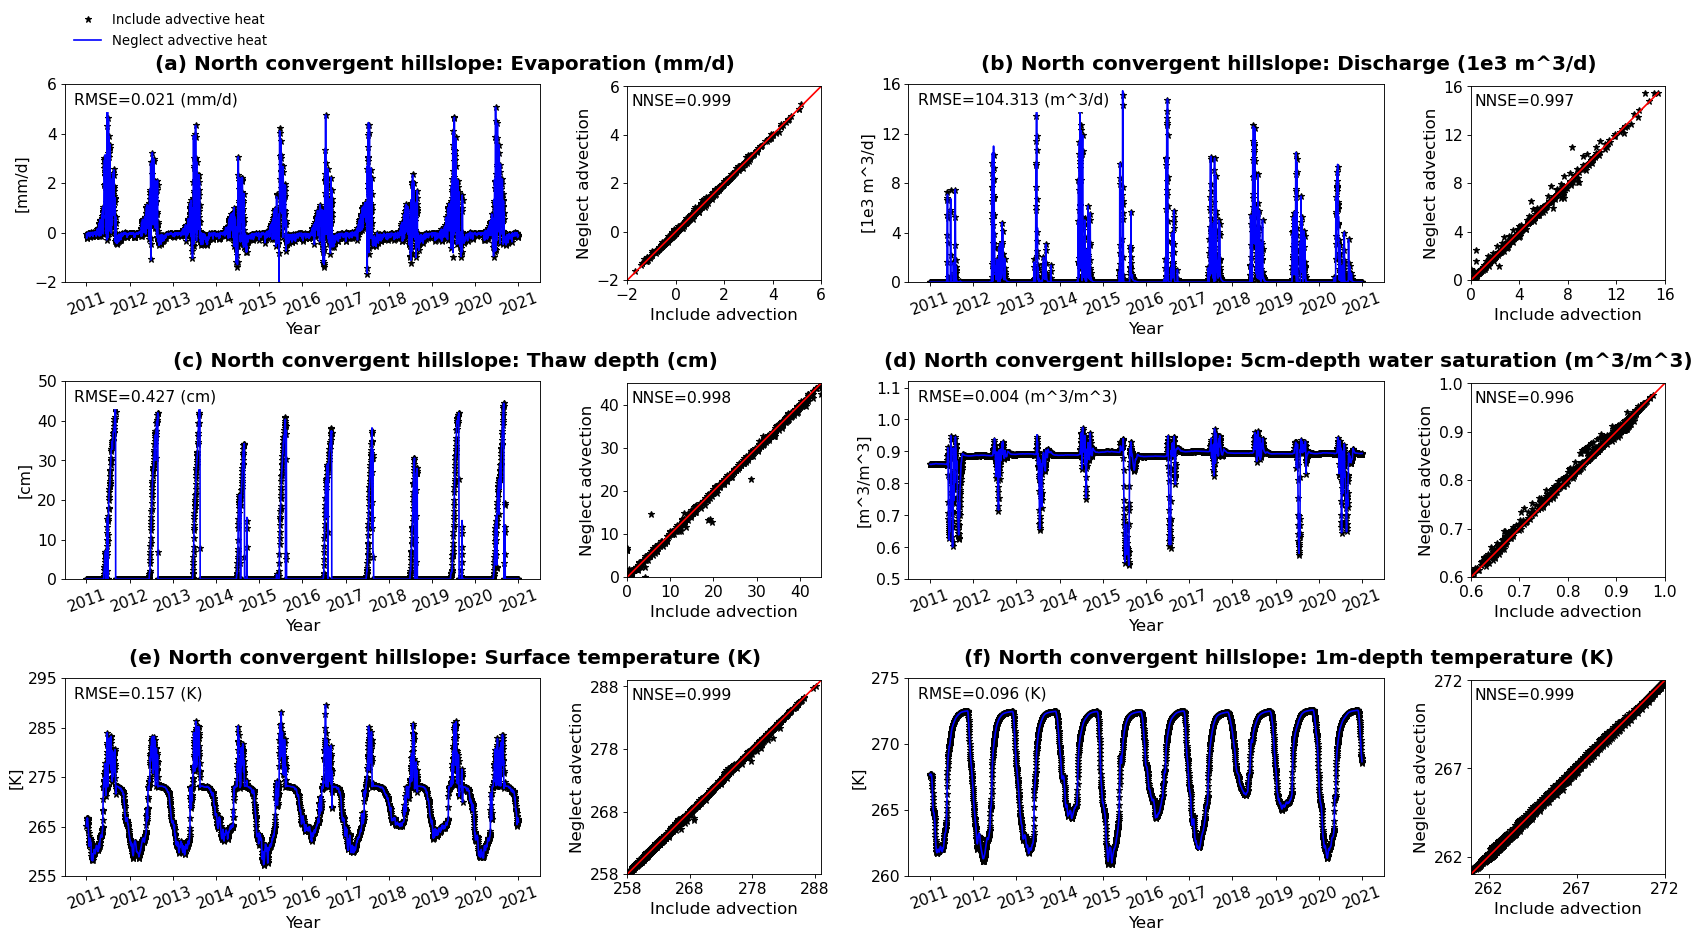

Supplement: Supplementary file 2 [file tc-16-4141-2022-supplement.zip › Sag/advection_north_convergent_sag.png]

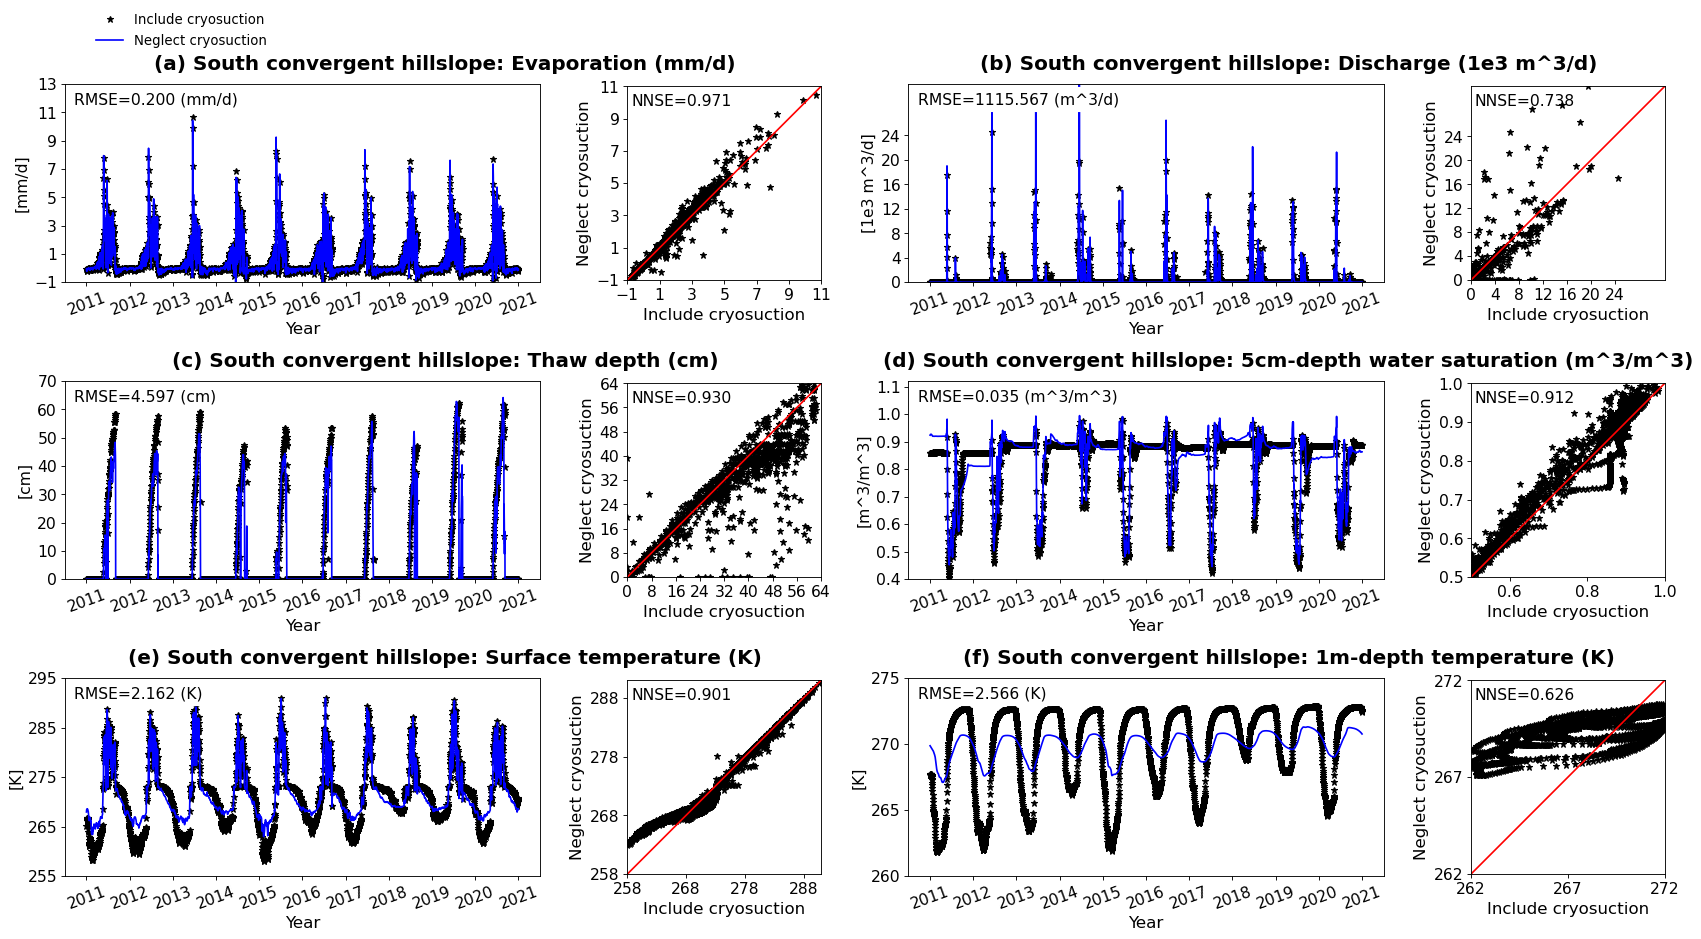

Supplement: Supplementary file 2 [file tc-16-4141-2022-supplement.zip › Sag/cryosuction_south_convergent_sag.png]

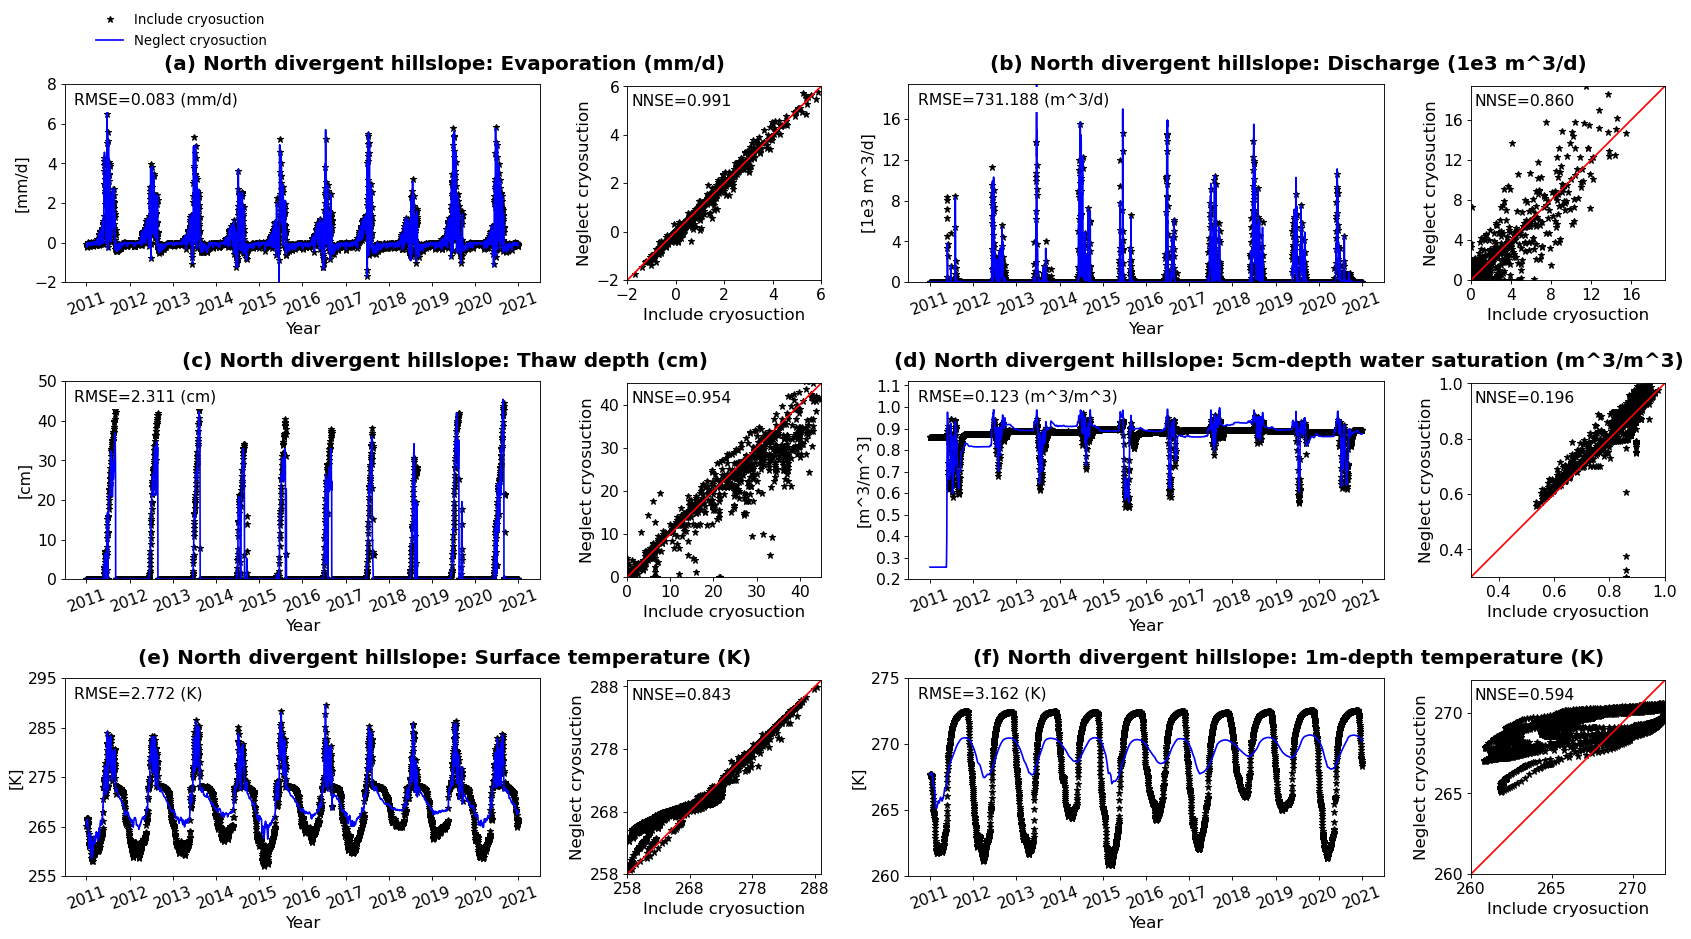

Supplement: Supplementary file 2 [file tc-16-4141-2022-supplement.zip › Sag/cryosuction_north_divergent_sag.png]

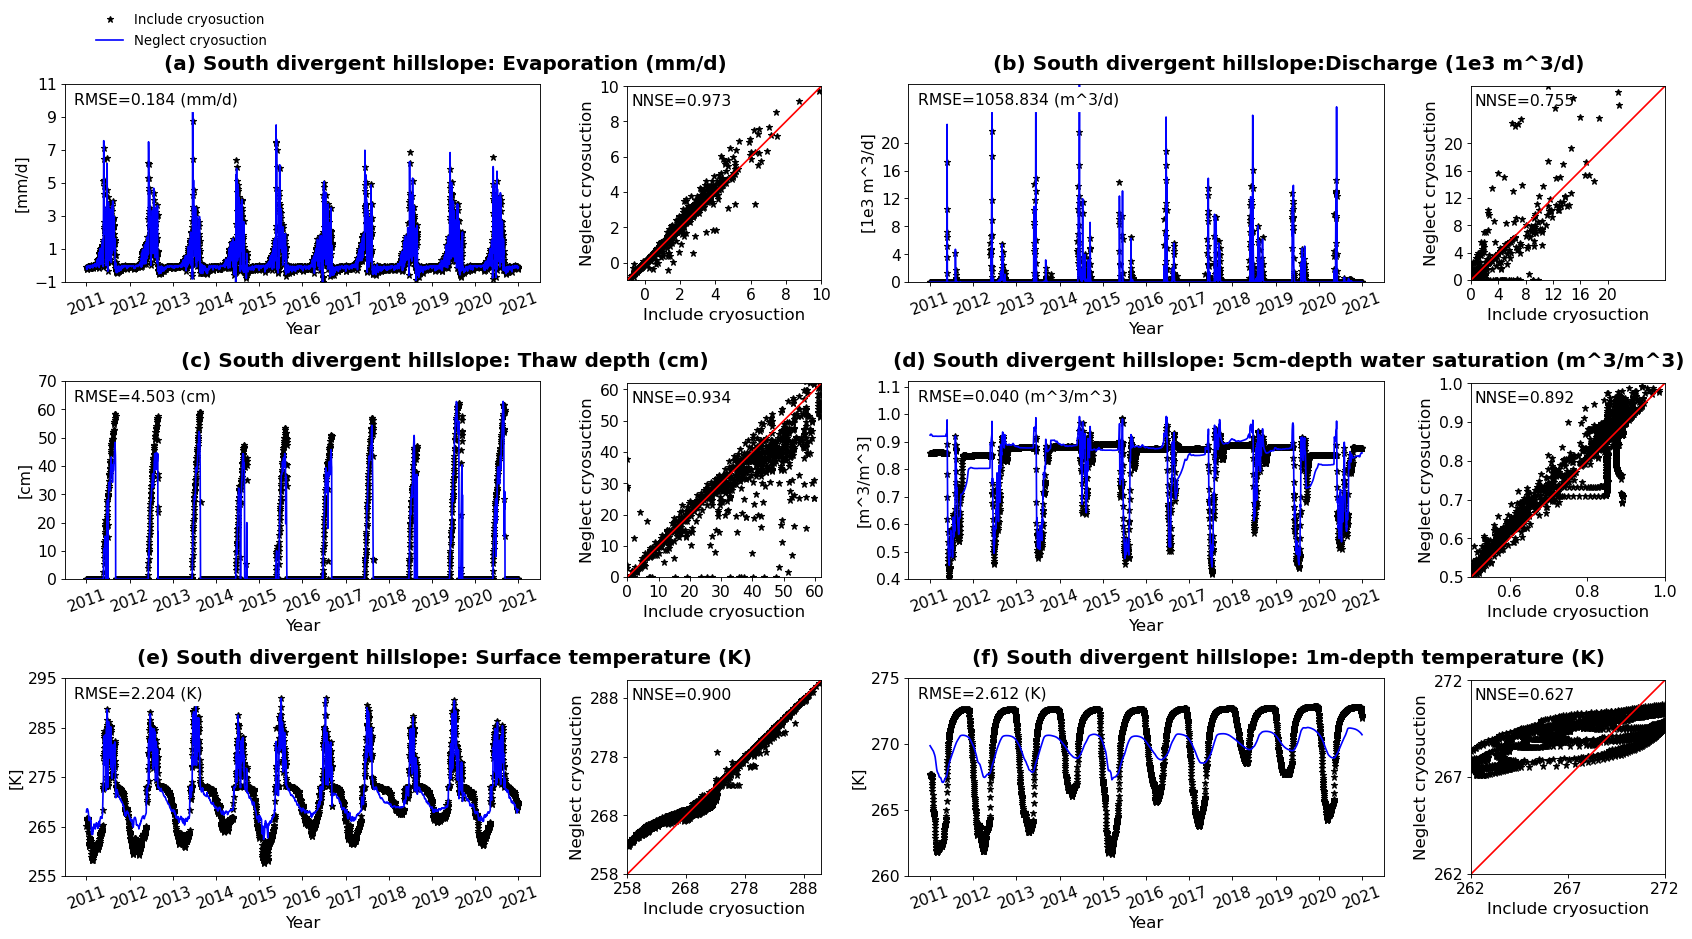

Supplement: Supplementary file 2 [file tc-16-4141-2022-supplement.zip › Sag/cryosuction_south_divergent_sag.png]

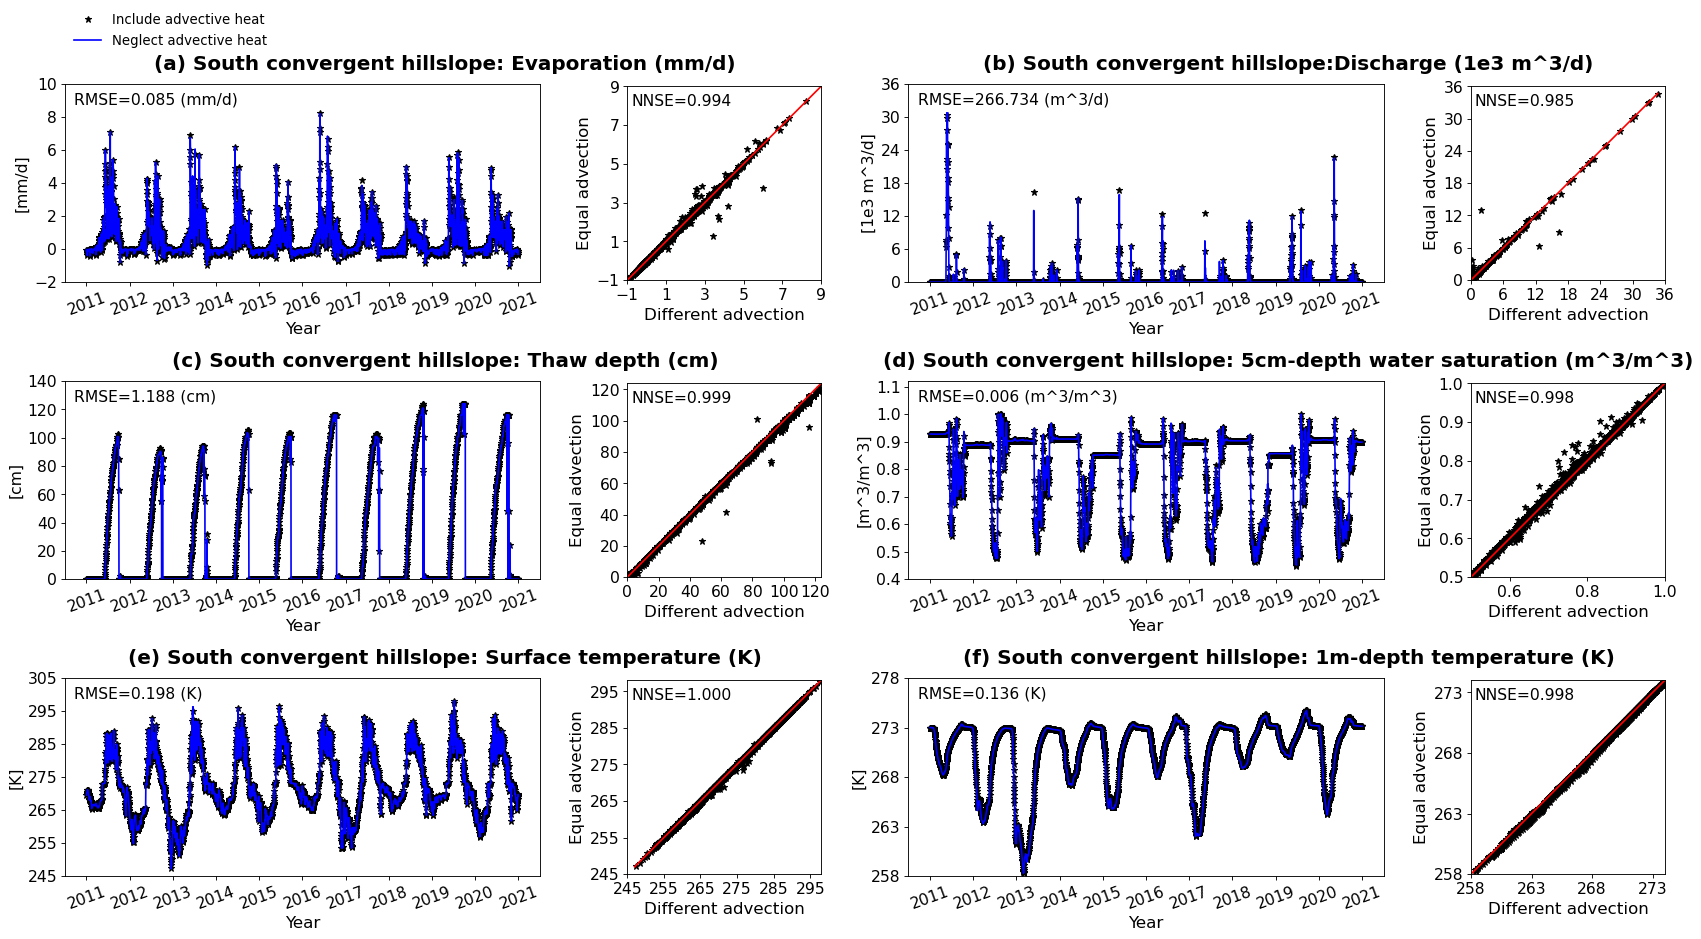

Supplement: Supplementary file 2 [file tc-16-4141-2022-supplement.zip › Teller/advection_south_convergent_teller.png]

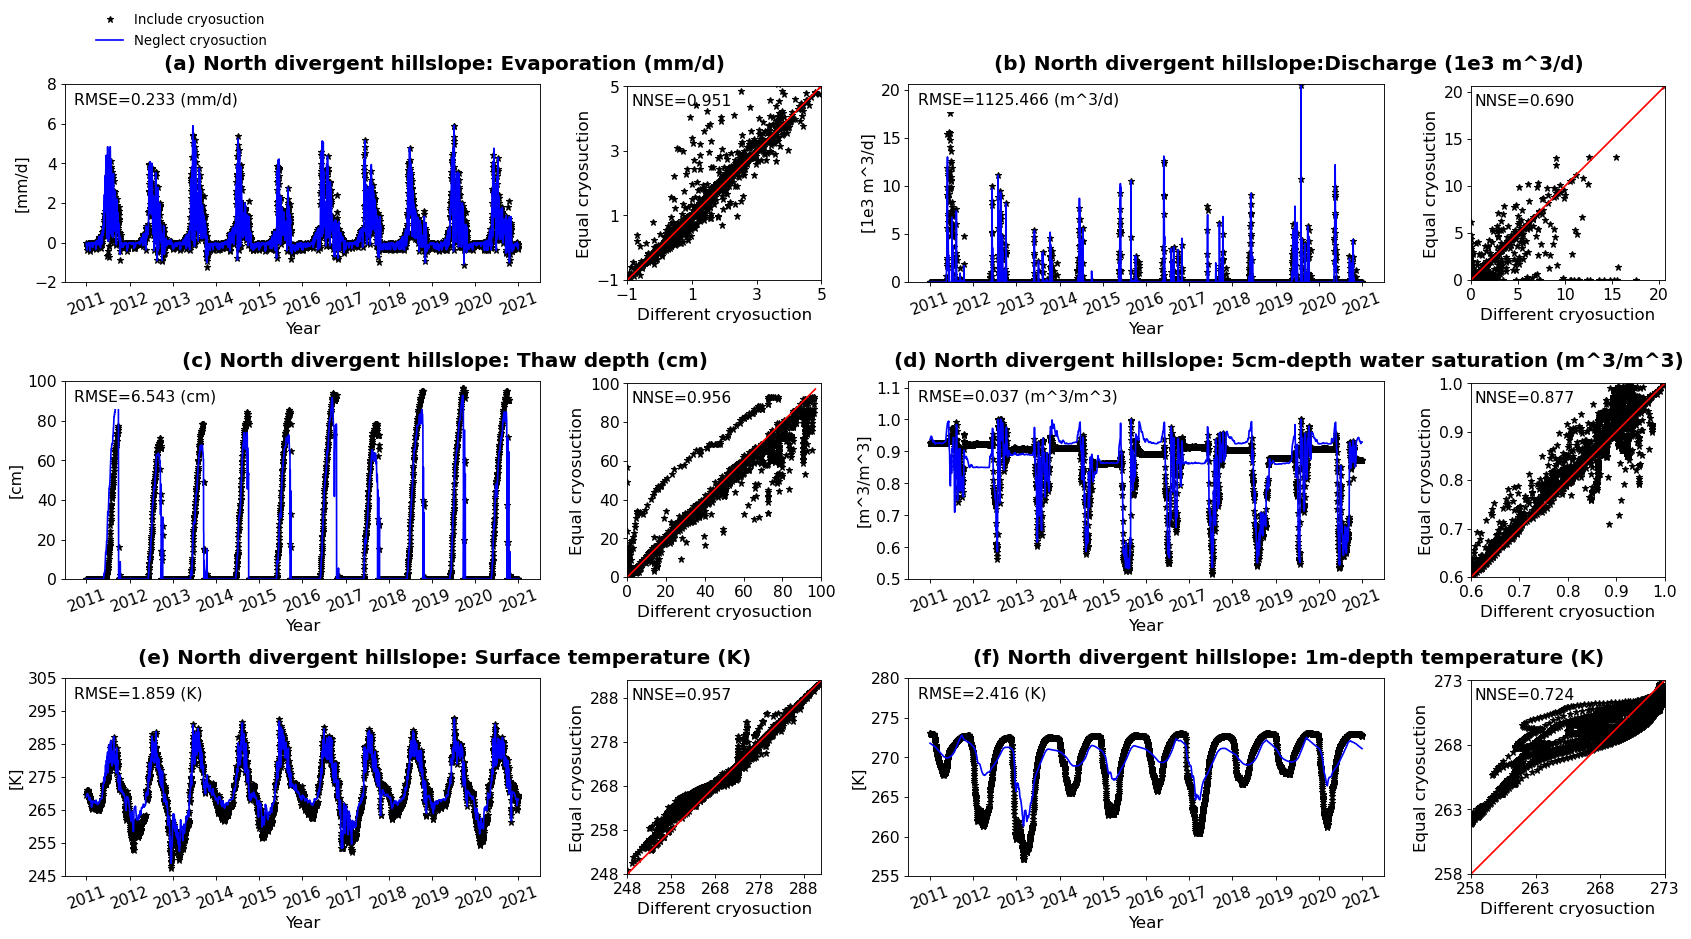

Supplement: Supplementary file 2 [file tc-16-4141-2022-supplement.zip › Teller/cryosuction_north_divergent_teller.png]

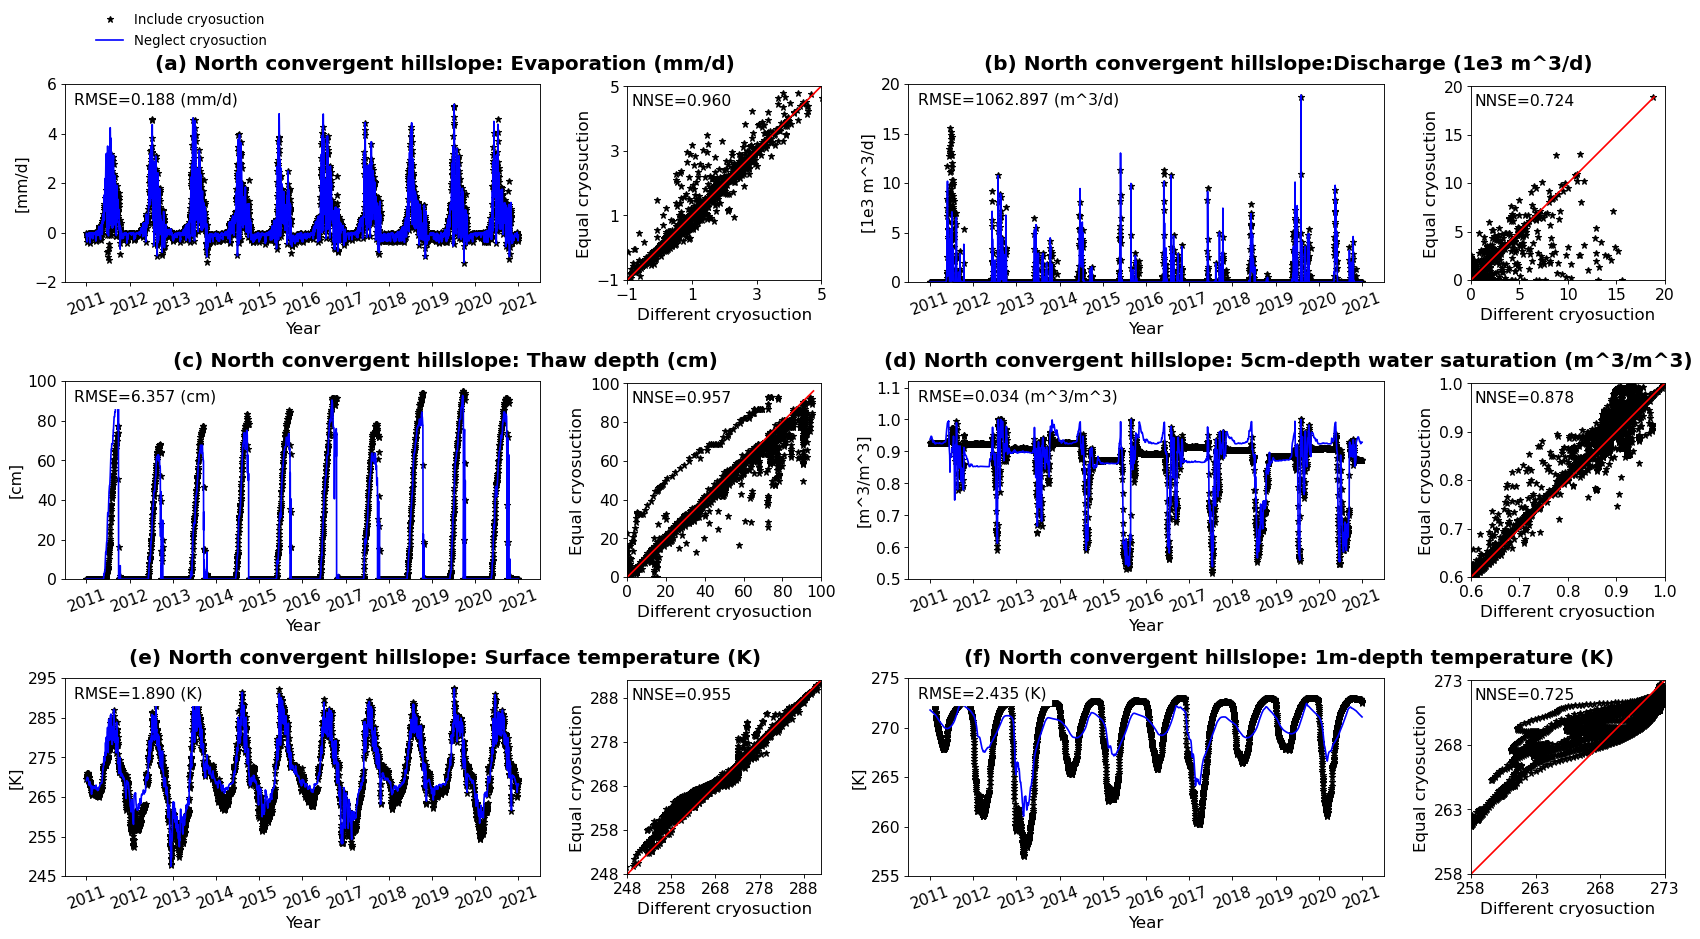

Supplement: Supplementary file 2 [file tc-16-4141-2022-supplement.zip › Teller/cryosuction_north_convergent_teller.png]

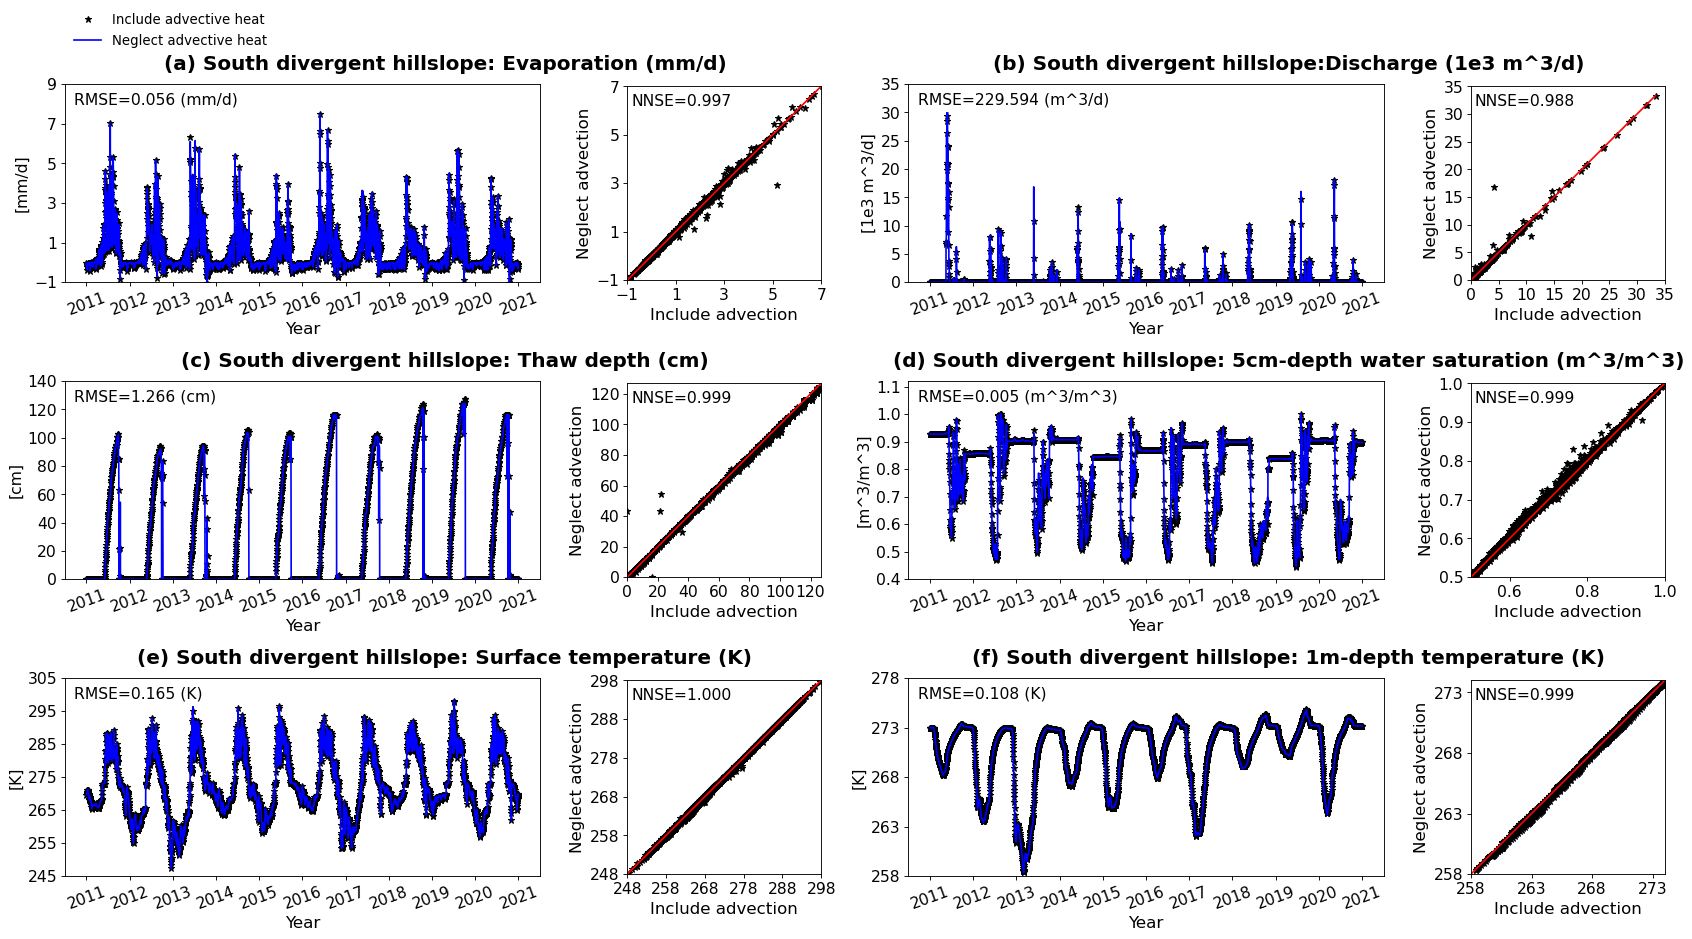

Supplement: Supplementary file 2 [file tc-16-4141-2022-supplement.zip › Teller/advection_south_divergent_teller.png]

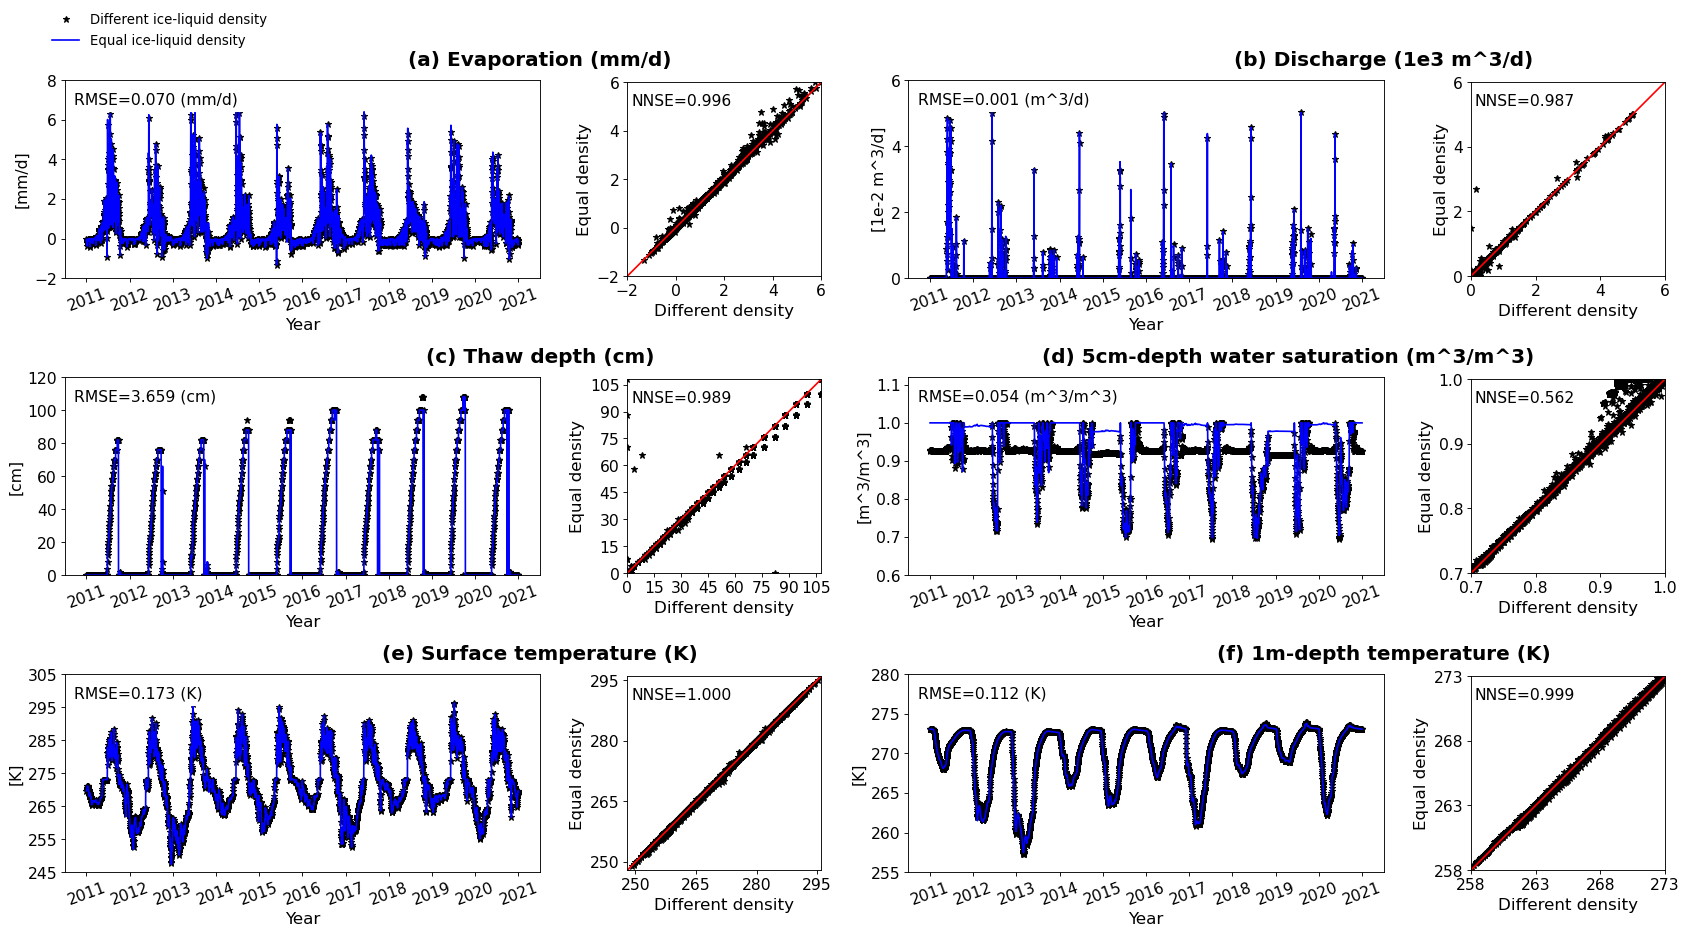

Supplement: Supplementary file 2 [file tc-16-4141-2022-supplement.zip › Teller/density_column_teller.png]

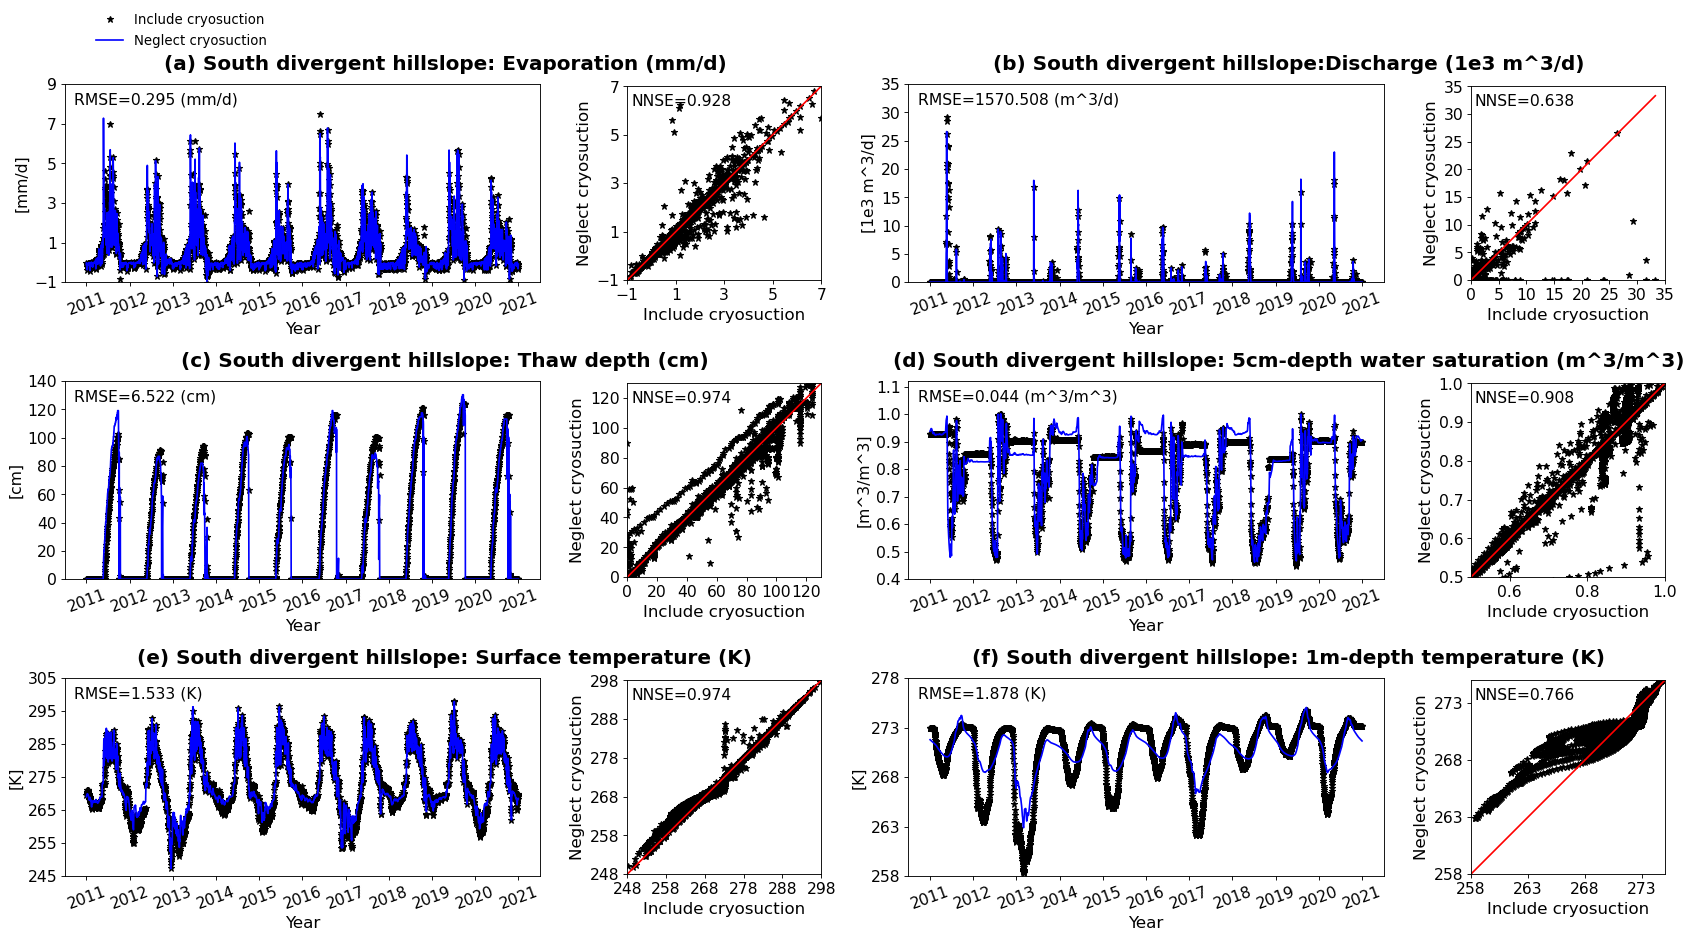

Supplement: Supplementary file 2 [file tc-16-4141-2022-supplement.zip › Teller/cryosuction_south_divergent_teller.png]

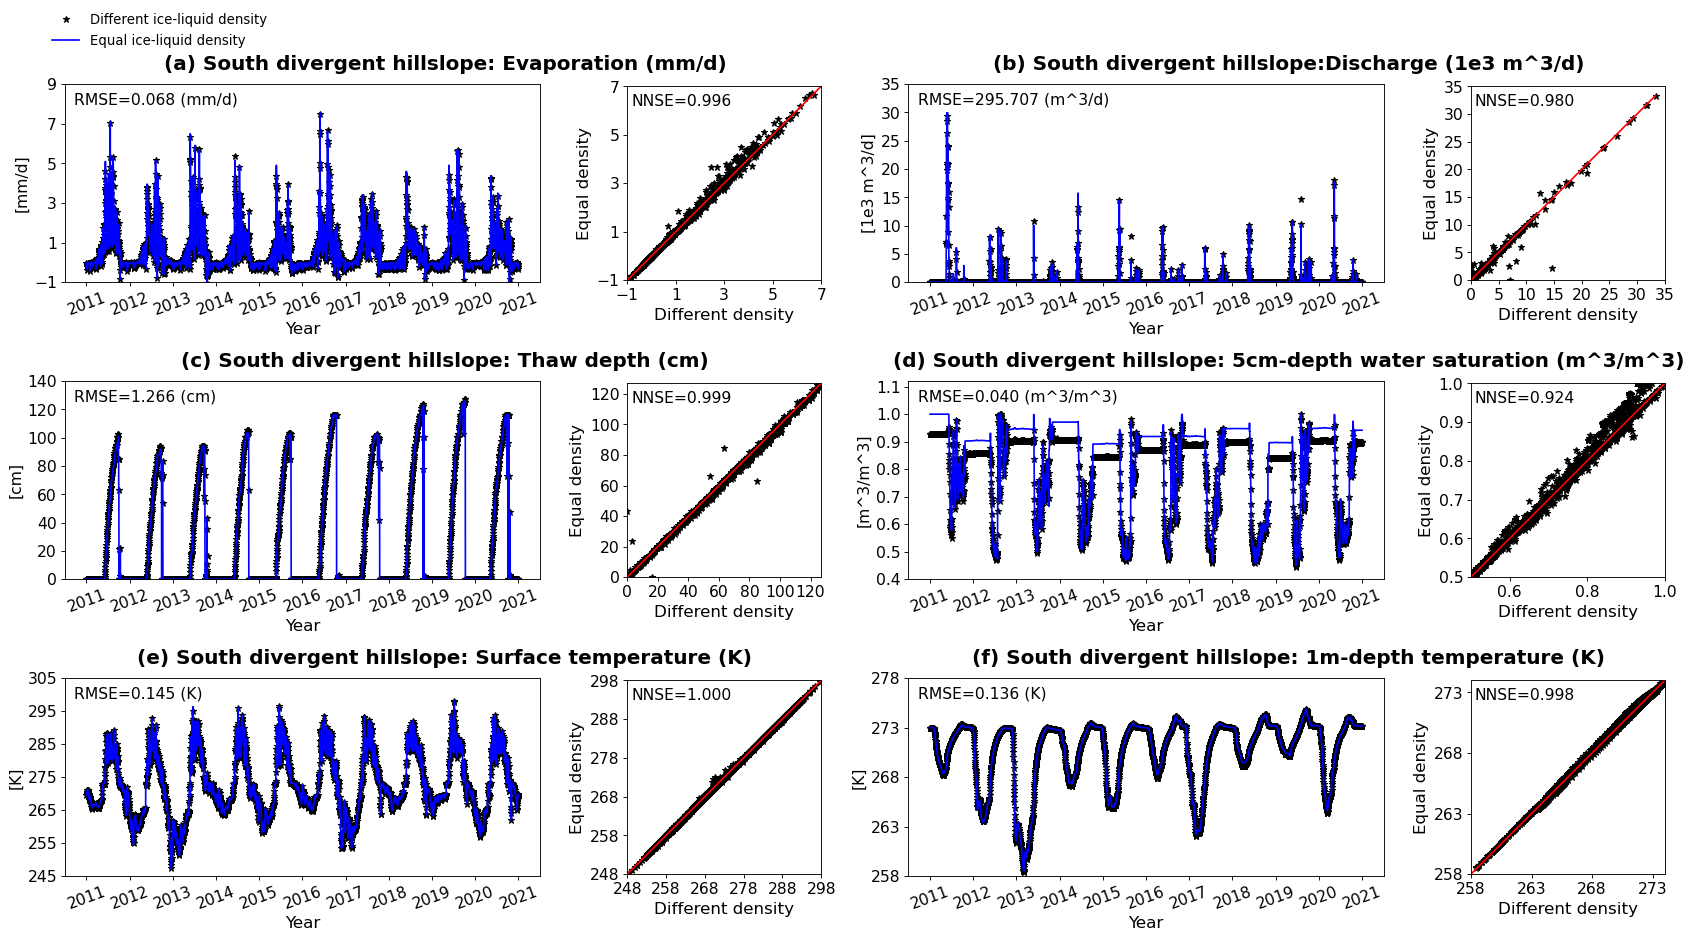

Supplement: Supplementary file 2 [file tc-16-4141-2022-supplement.zip › Teller/density_south_divergent_teller.png]

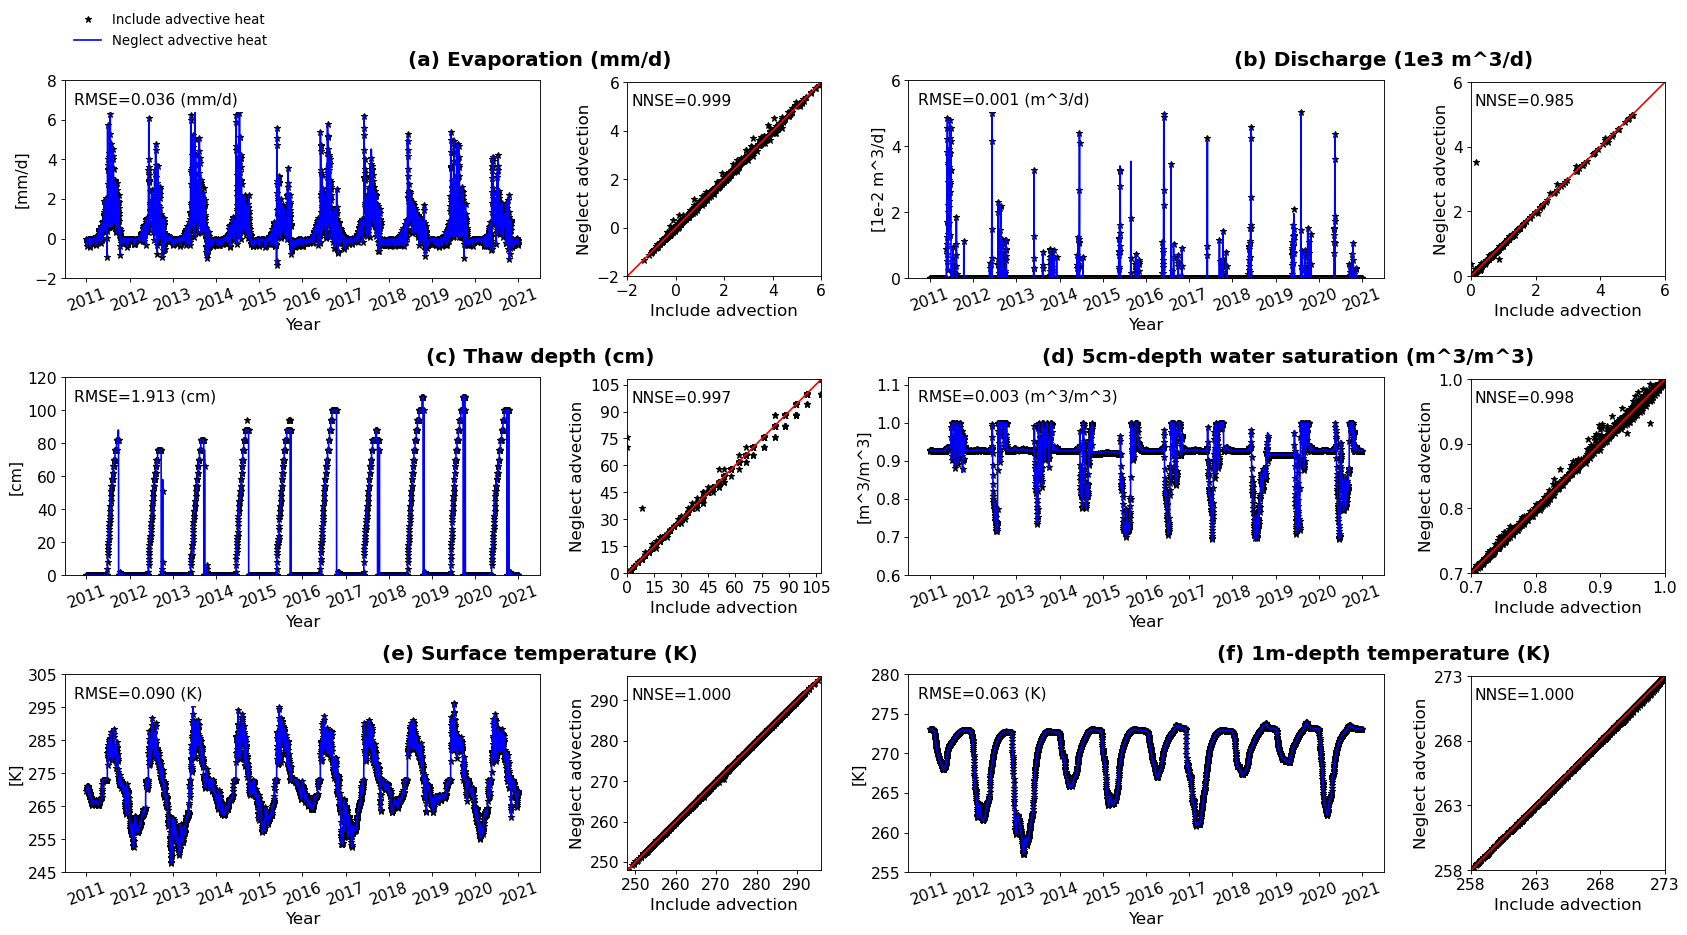

Supplement: Supplementary file 2 [file tc-16-4141-2022-supplement.zip › Teller/advection_column_teller.png]

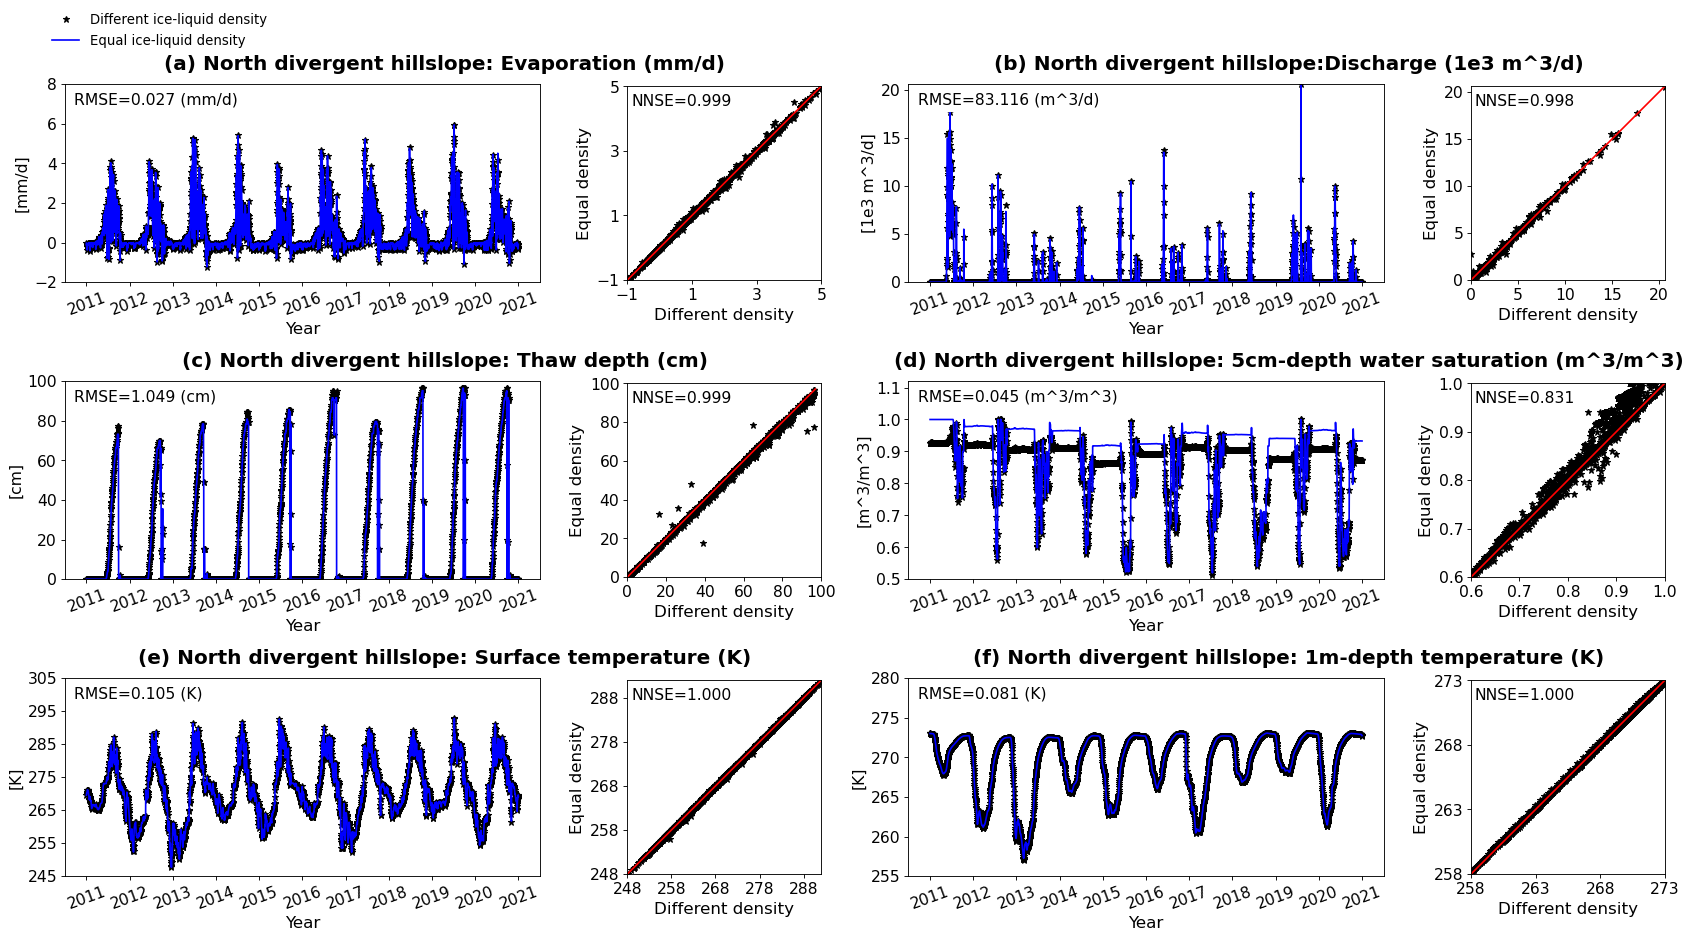

Supplement: Supplementary file 2 [file tc-16-4141-2022-supplement.zip › Teller/density_north_divergent_teller.png]

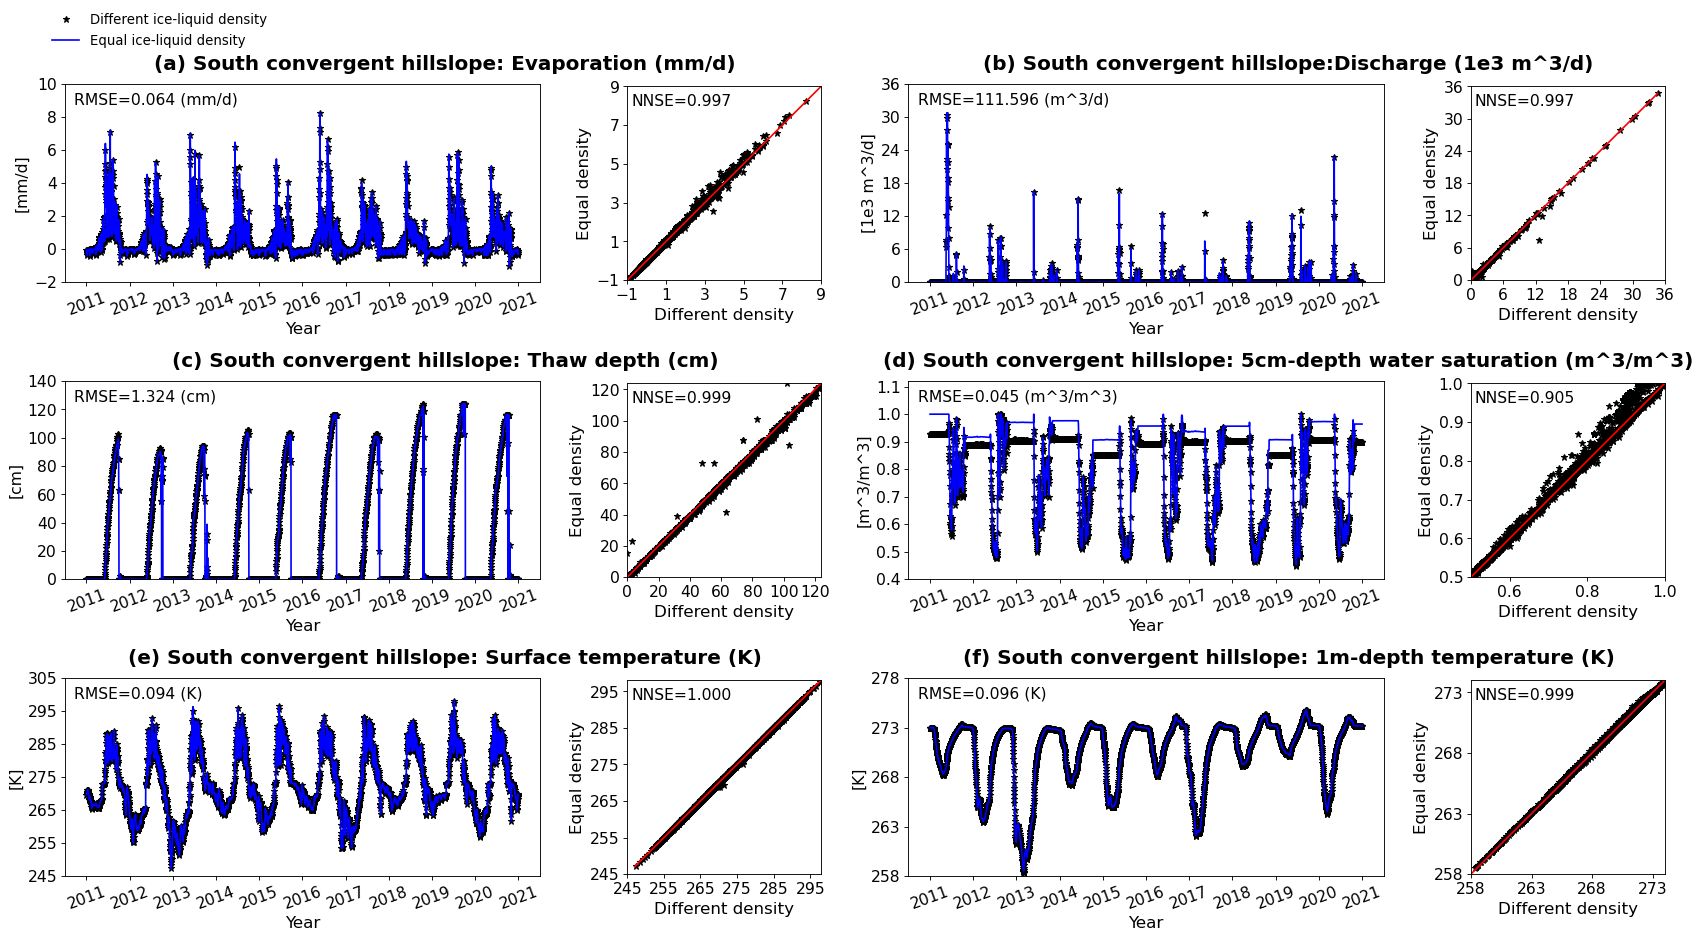

Supplement: Supplementary file 2 [file tc-16-4141-2022-supplement.zip › Teller/density_south_convergent_teller.png]

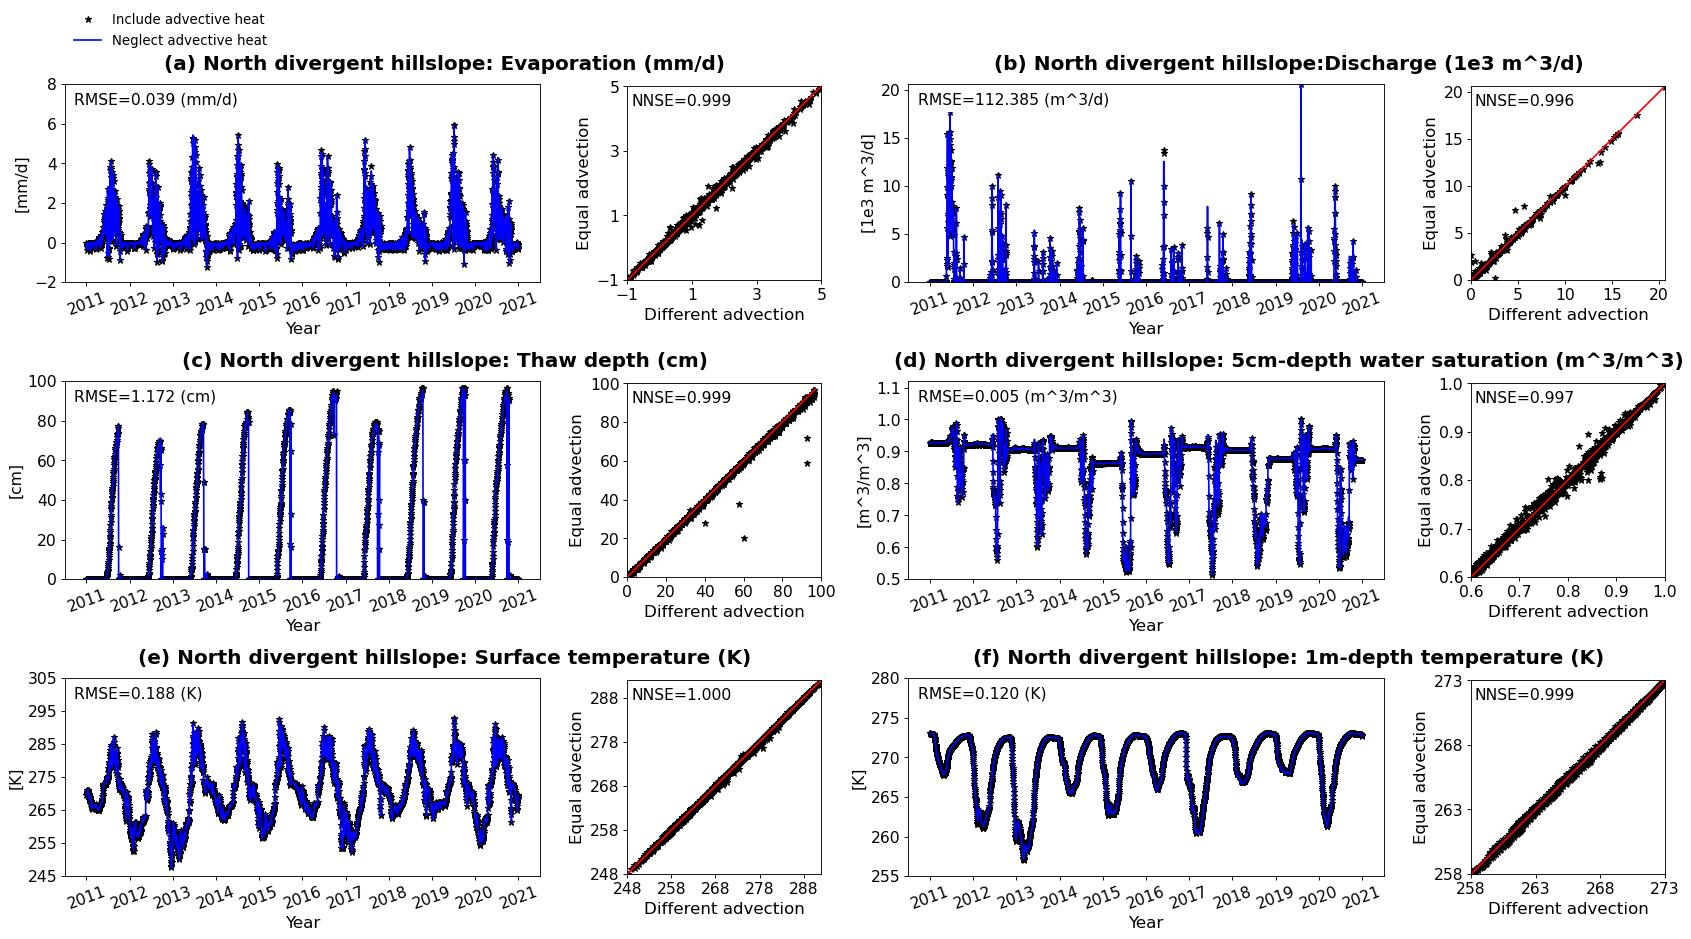

Supplement: Supplementary file 2 [file tc-16-4141-2022-supplement.zip › Teller/advection_north_divergent_teller.png]

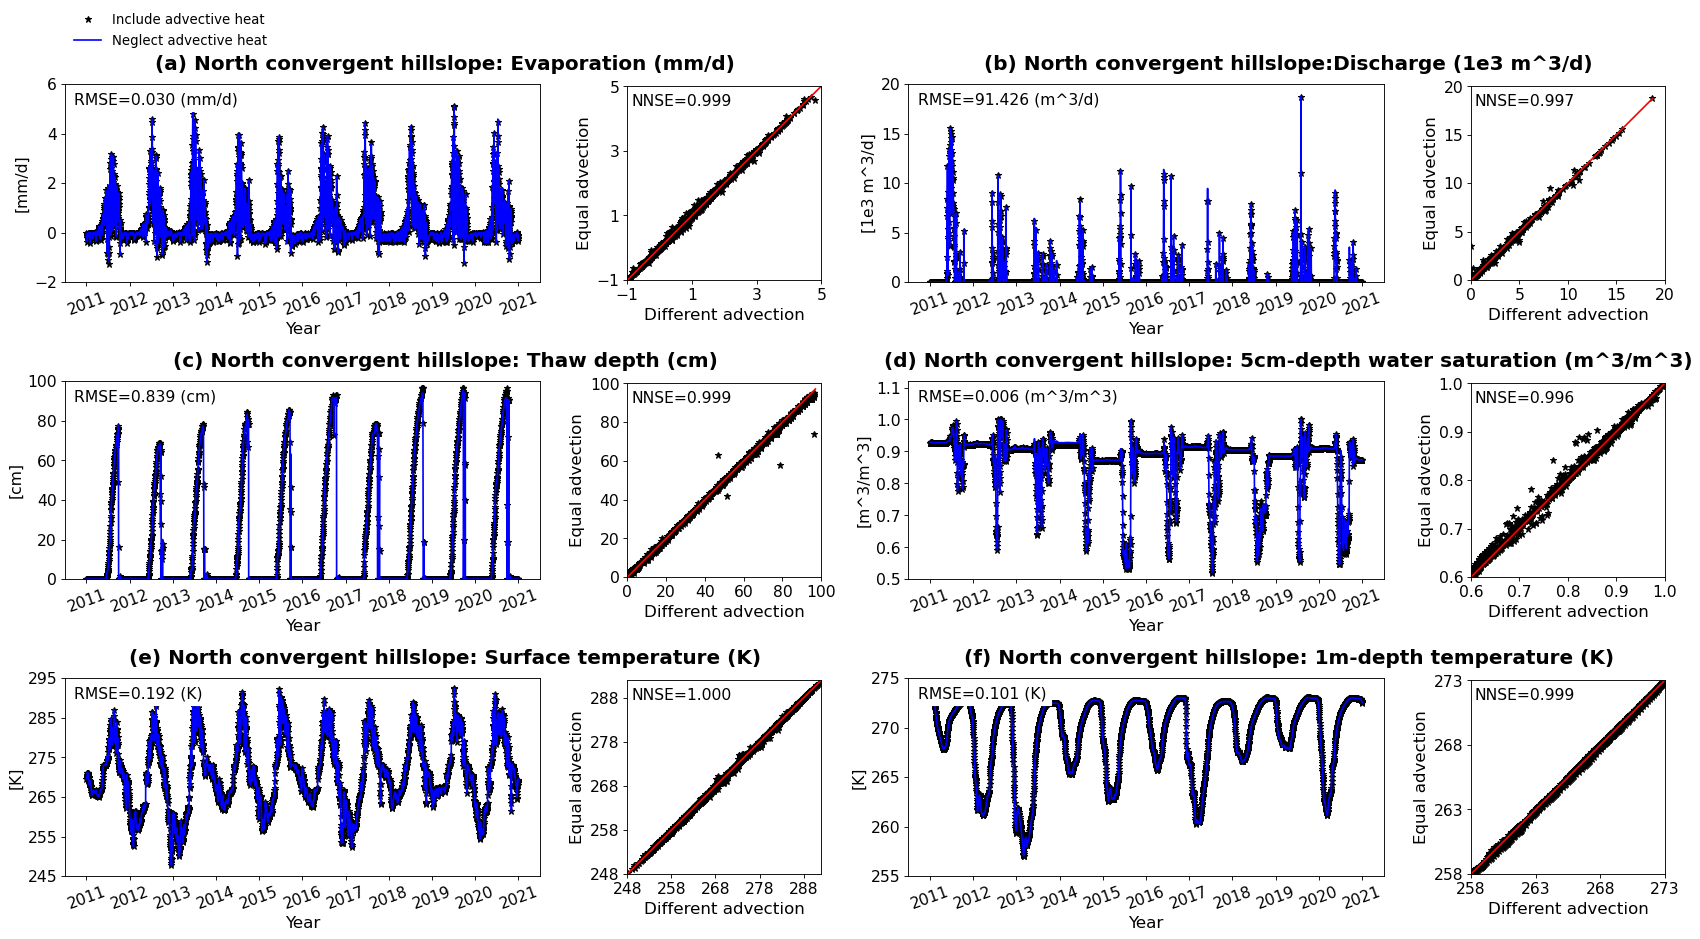

Supplement: Supplementary file 2 [file tc-16-4141-2022-supplement.zip › Teller/advection_north_convergent_teller.png]

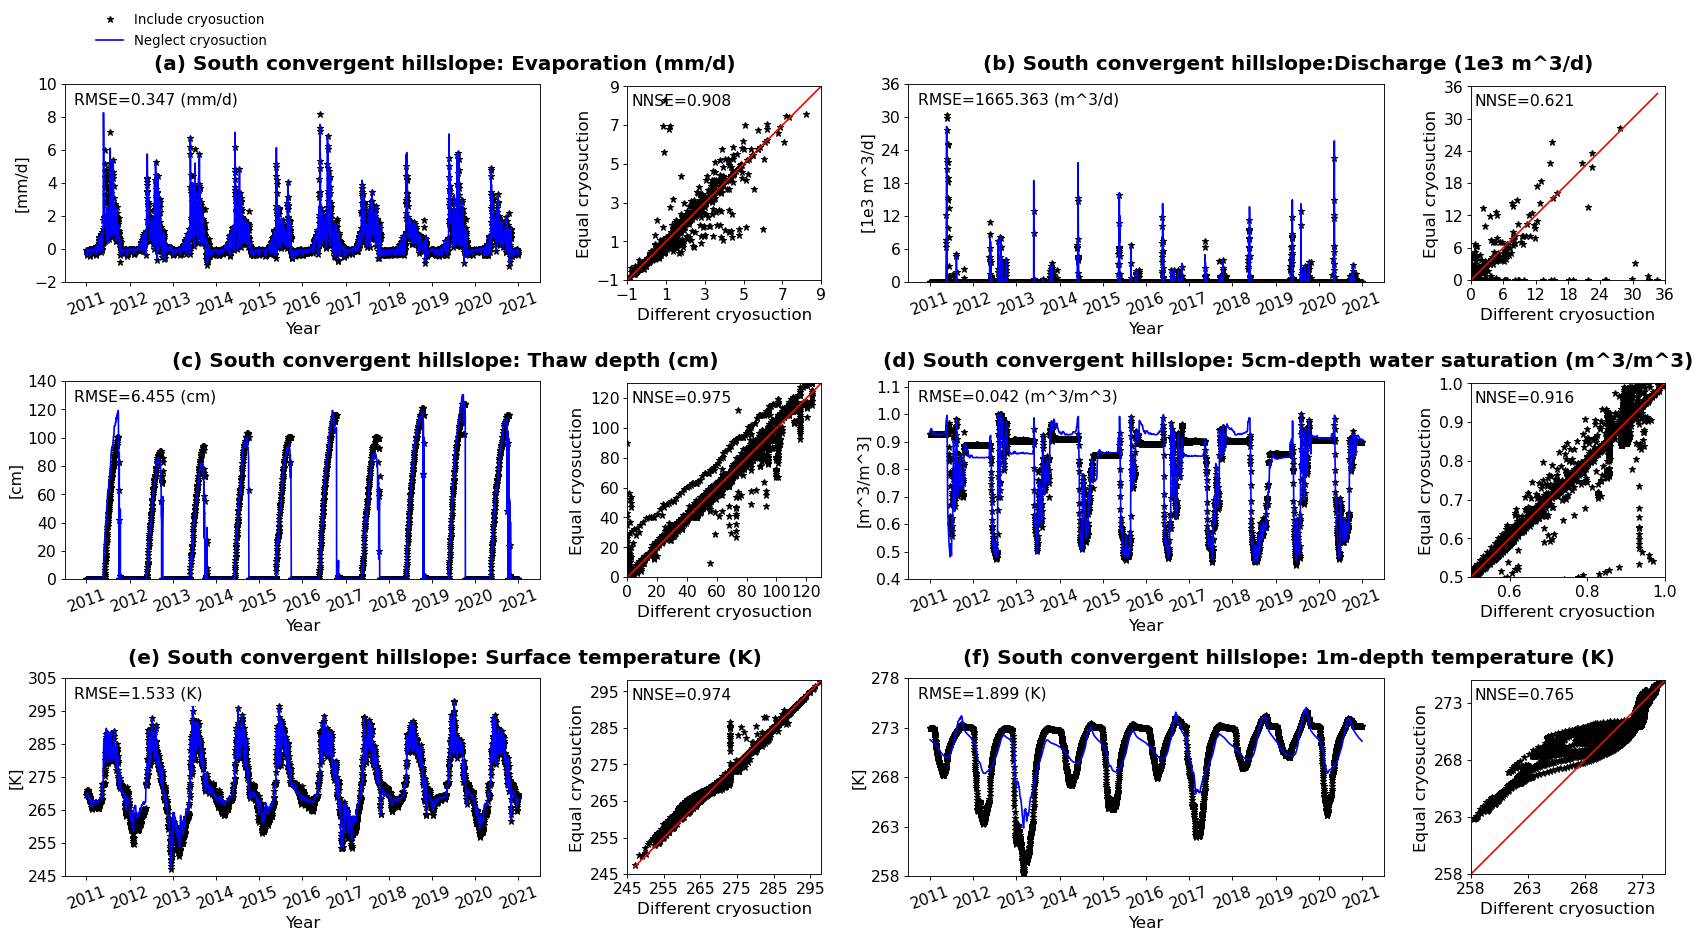

Supplement: Supplementary file 2 [file tc-16-4141-2022-supplement.zip › Teller/cryosuction_south_convergent_teller.png]

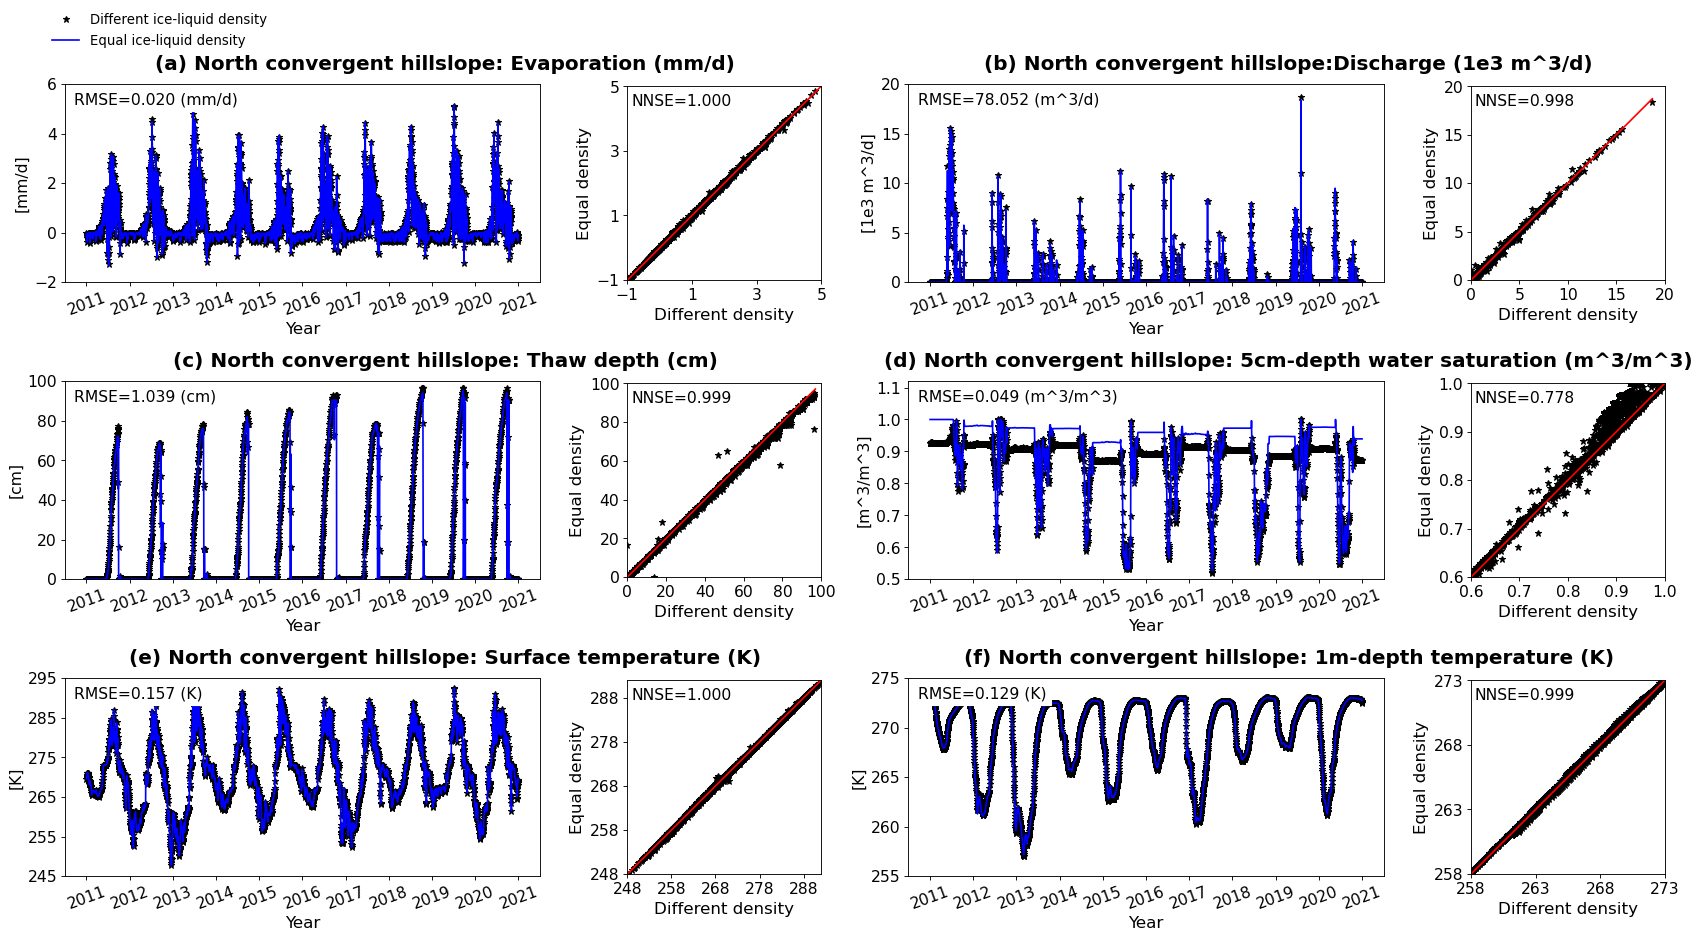

Supplement: Supplementary file 2 [file tc-16-4141-2022-supplement.zip › Teller/density_north_convergent_teller.png]

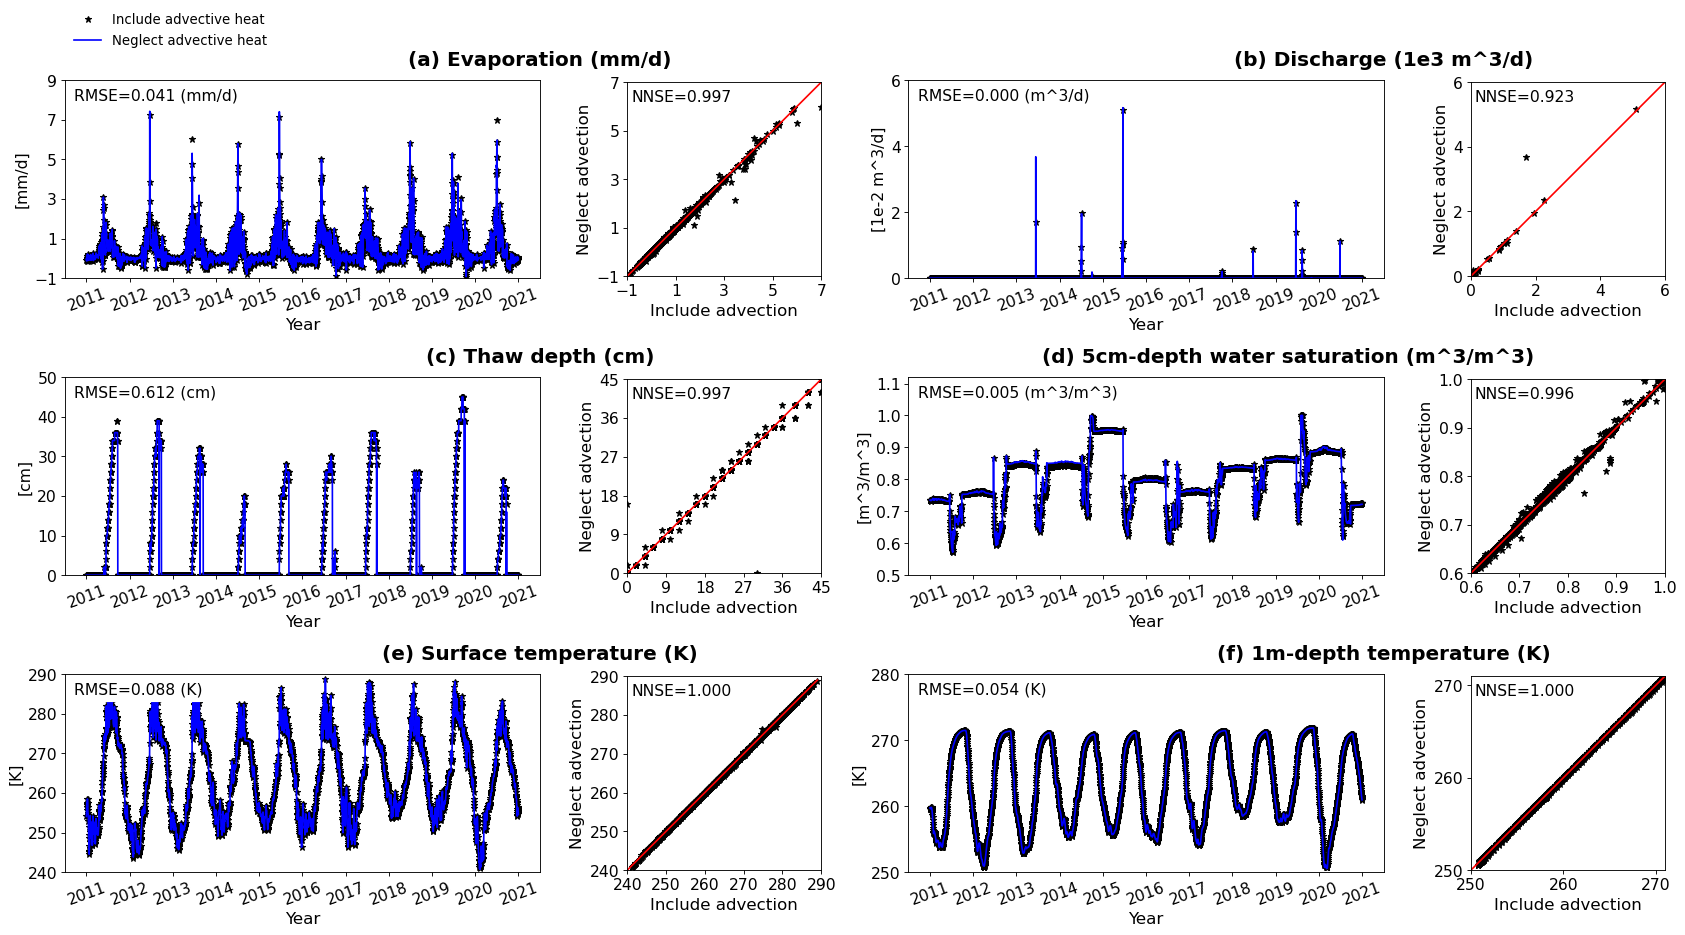

Supplement: Supplementary file 2 [file tc-16-4141-2022-supplement.zip › Barrow/advection_column_barrow.png]

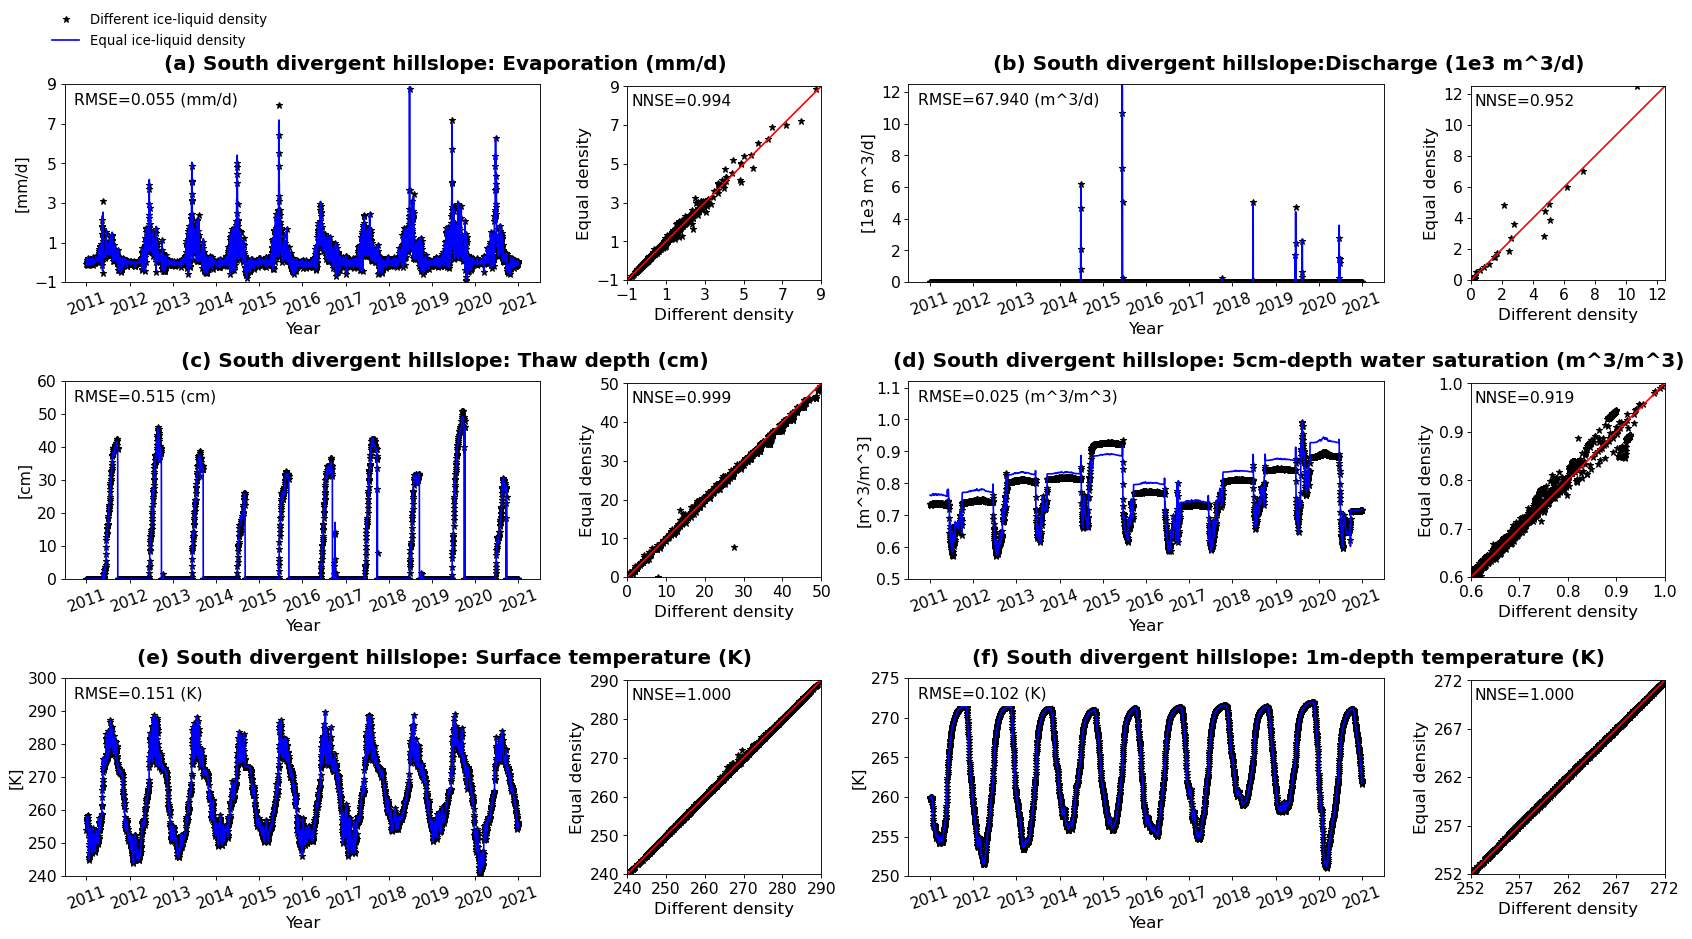

Supplement: Supplementary file 2 [file tc-16-4141-2022-supplement.zip › Barrow/density_south_divergent_barrow.png]

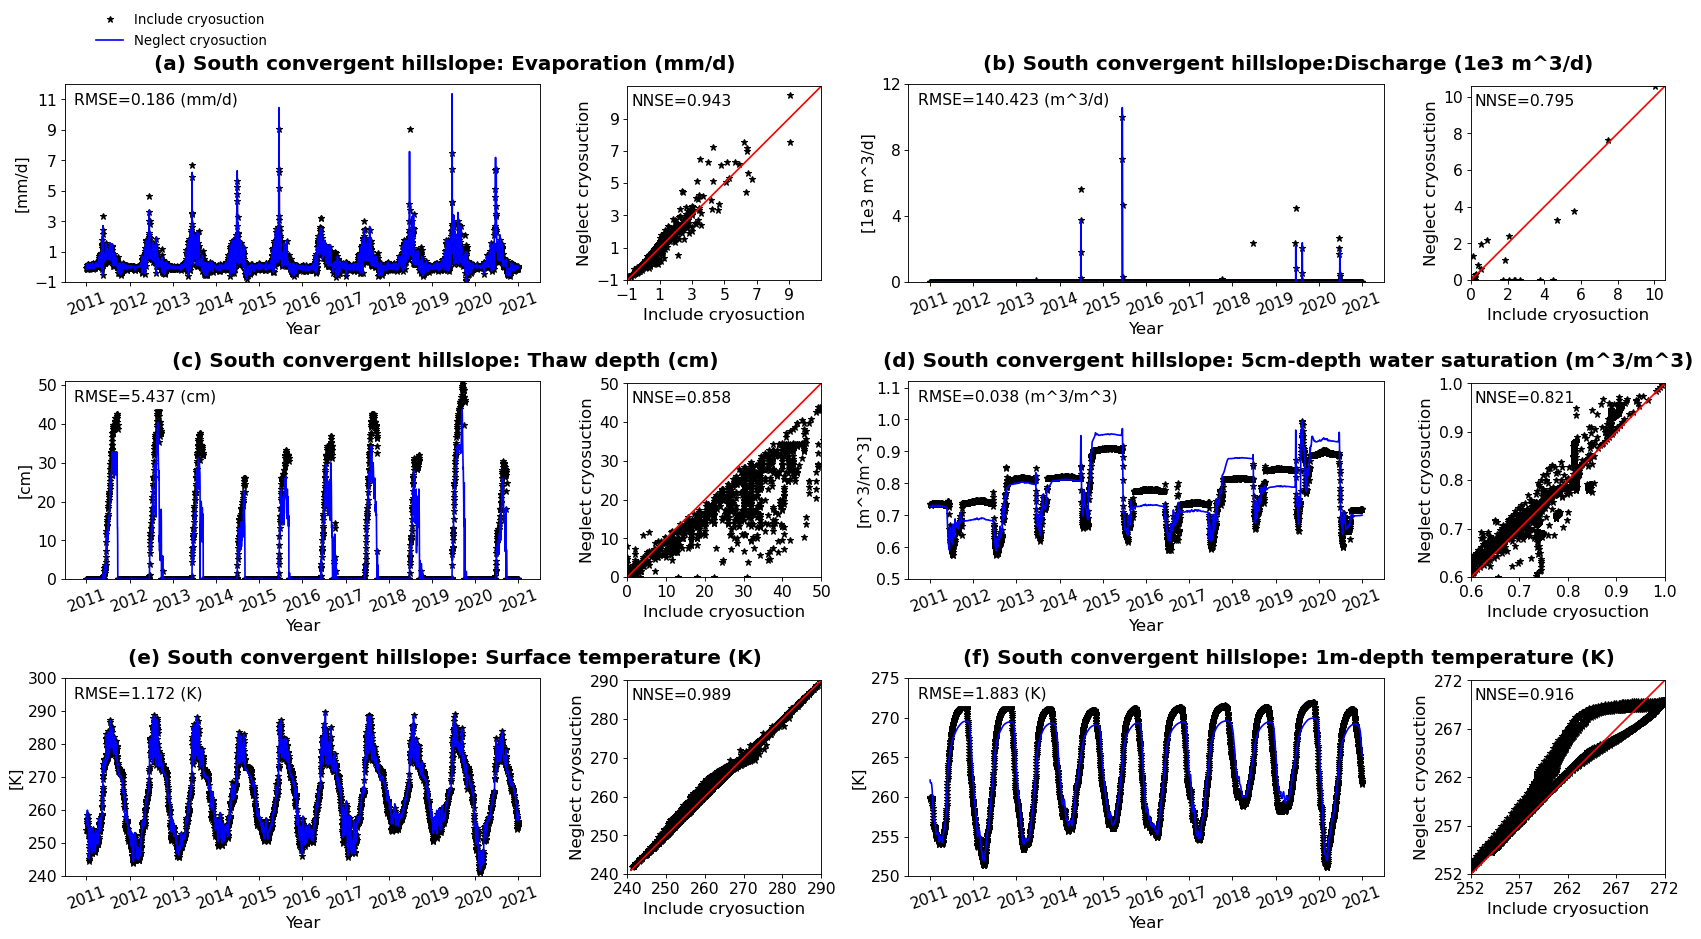

Supplement: Supplementary file 2 [file tc-16-4141-2022-supplement.zip › Barrow/cryosuction_south_convergent_barrow.png]

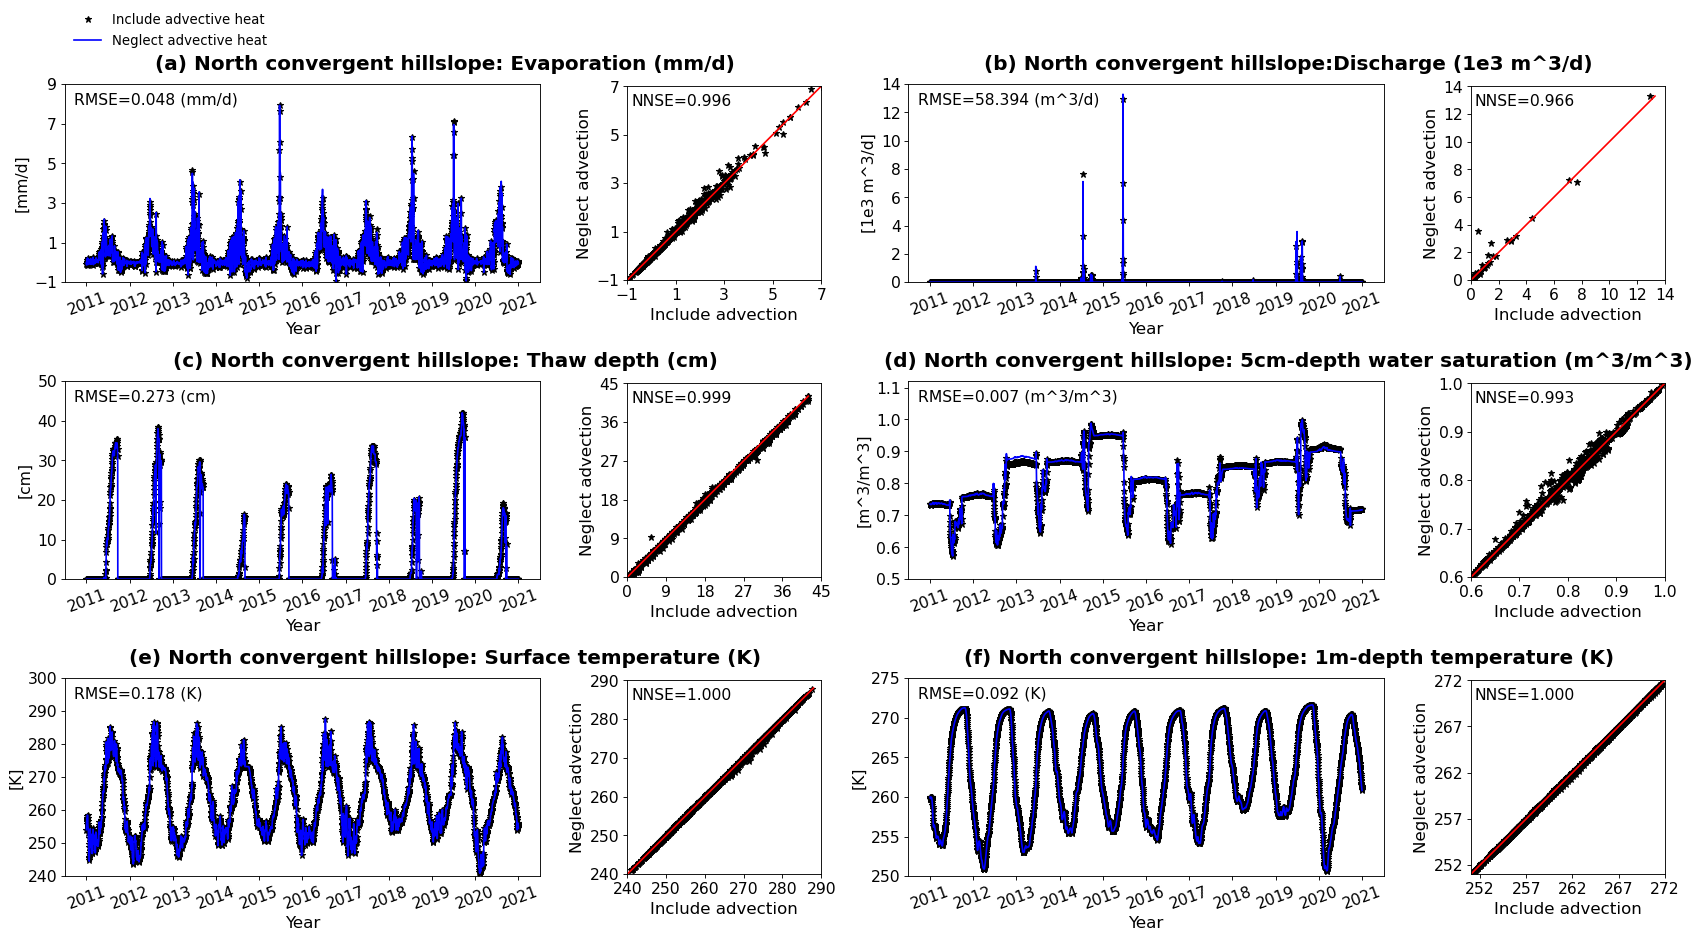

Supplement: Supplementary file 2 [file tc-16-4141-2022-supplement.zip › Barrow/advection_north_convergent_barrow.png]

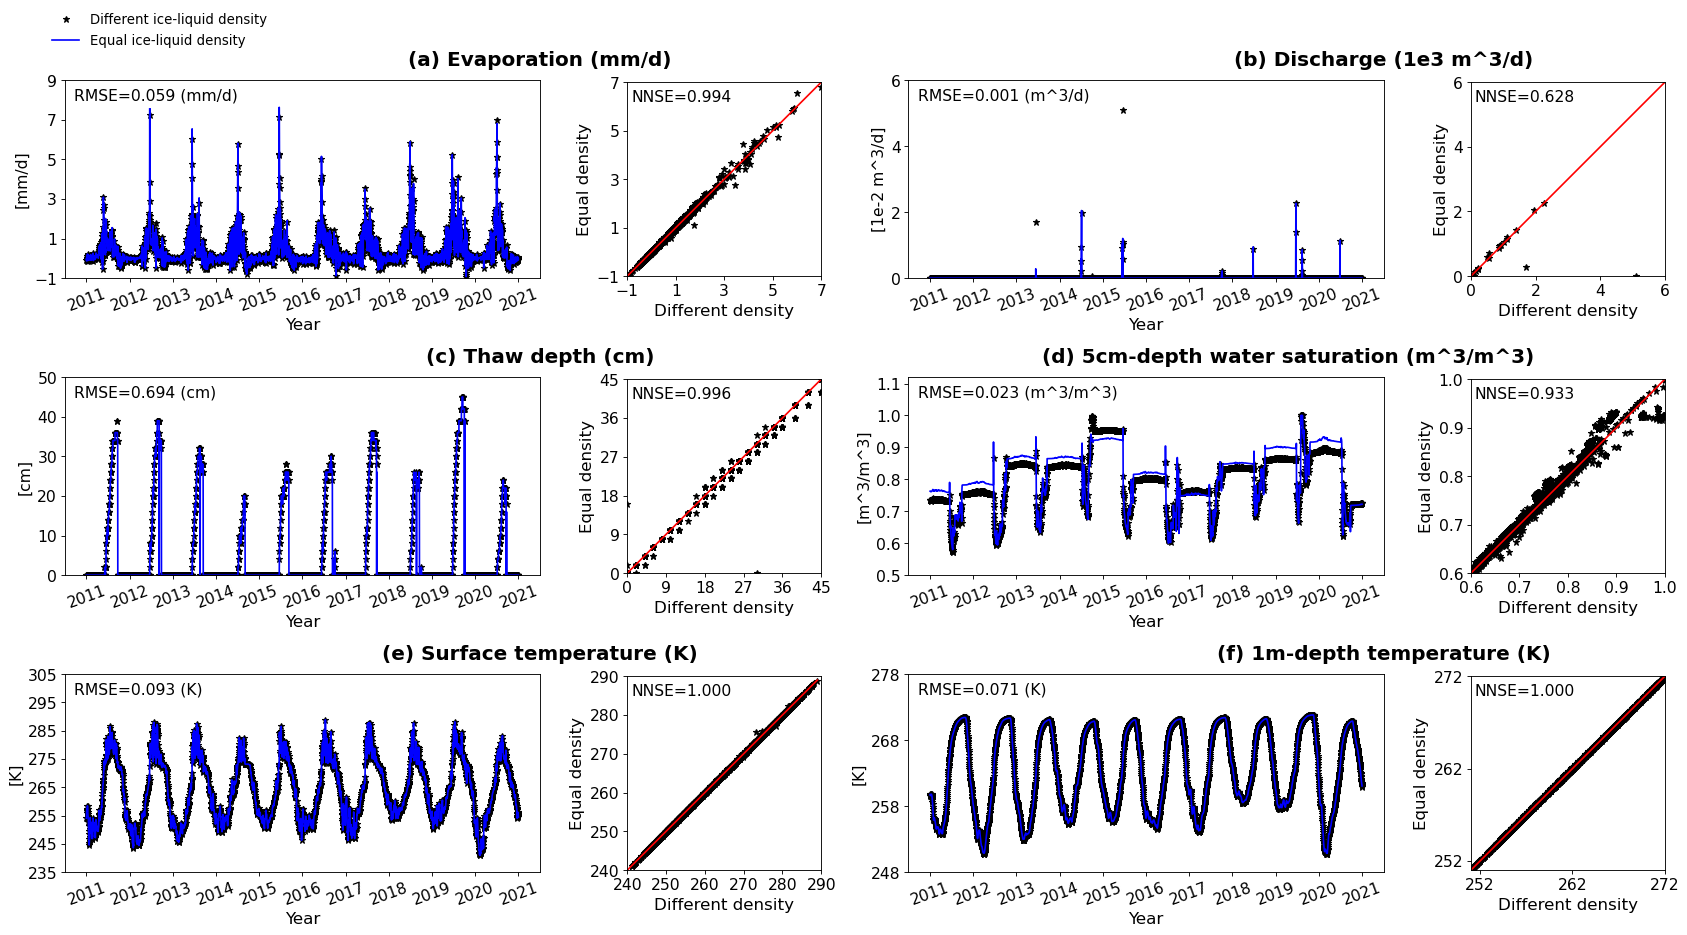

Supplement: Supplementary file 2 [file tc-16-4141-2022-supplement.zip › Barrow/density_column_barrow.png]

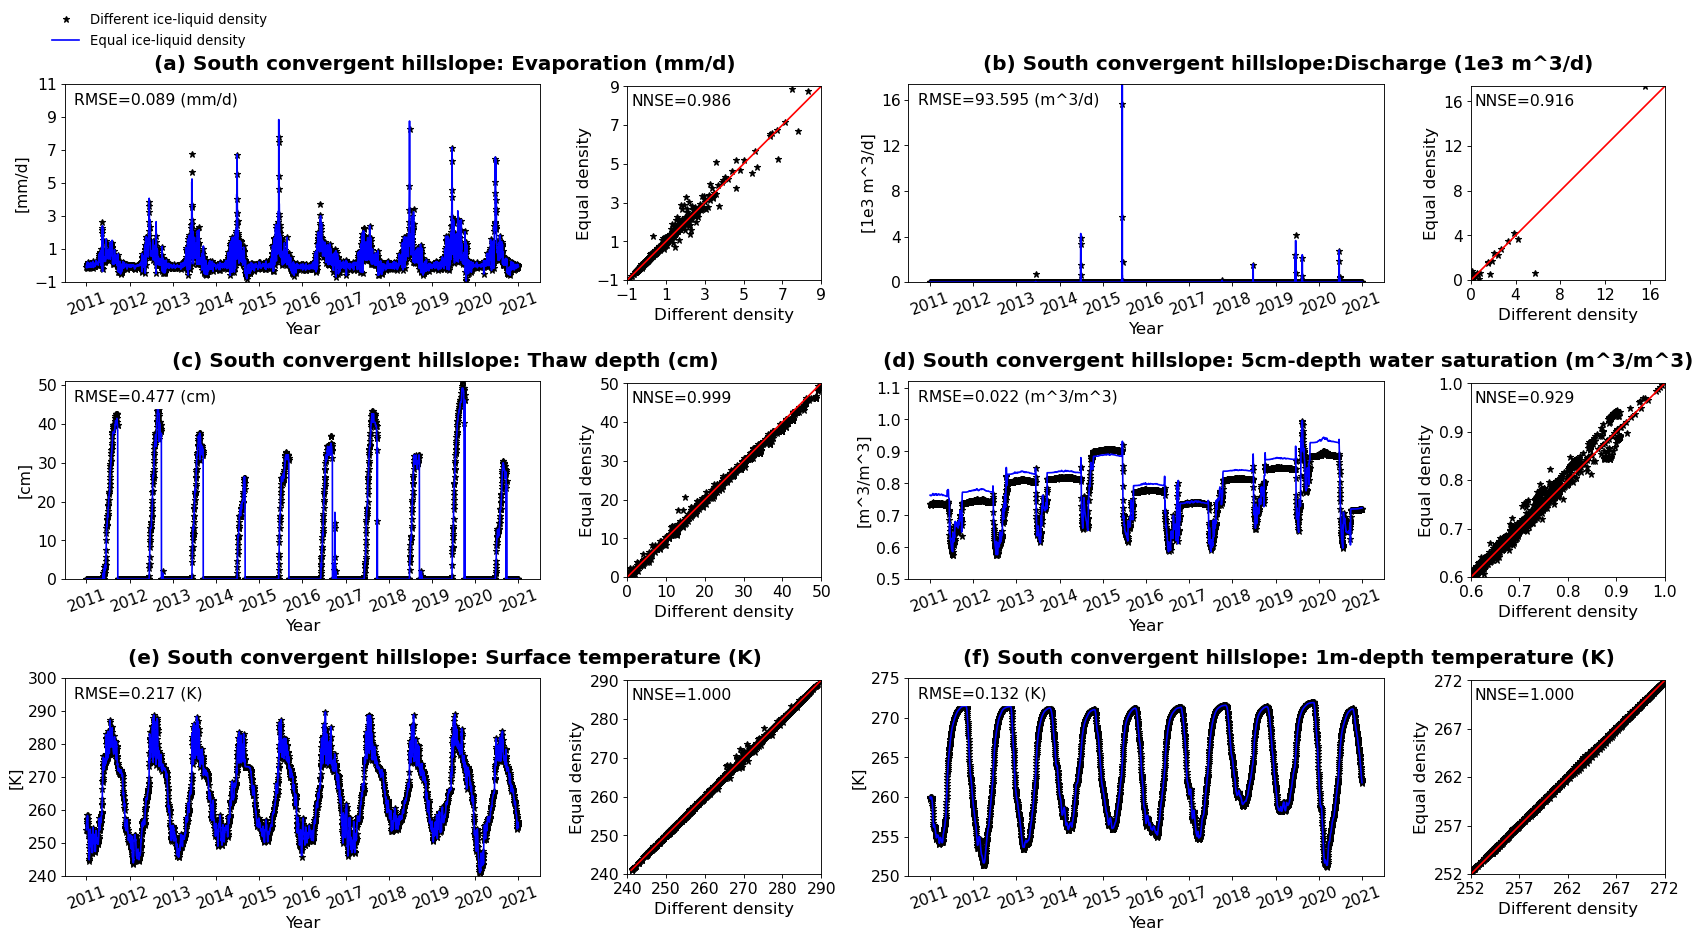

Supplement: Supplementary file 2 [file tc-16-4141-2022-supplement.zip › Barrow/density_south_convergent_barrow.png]

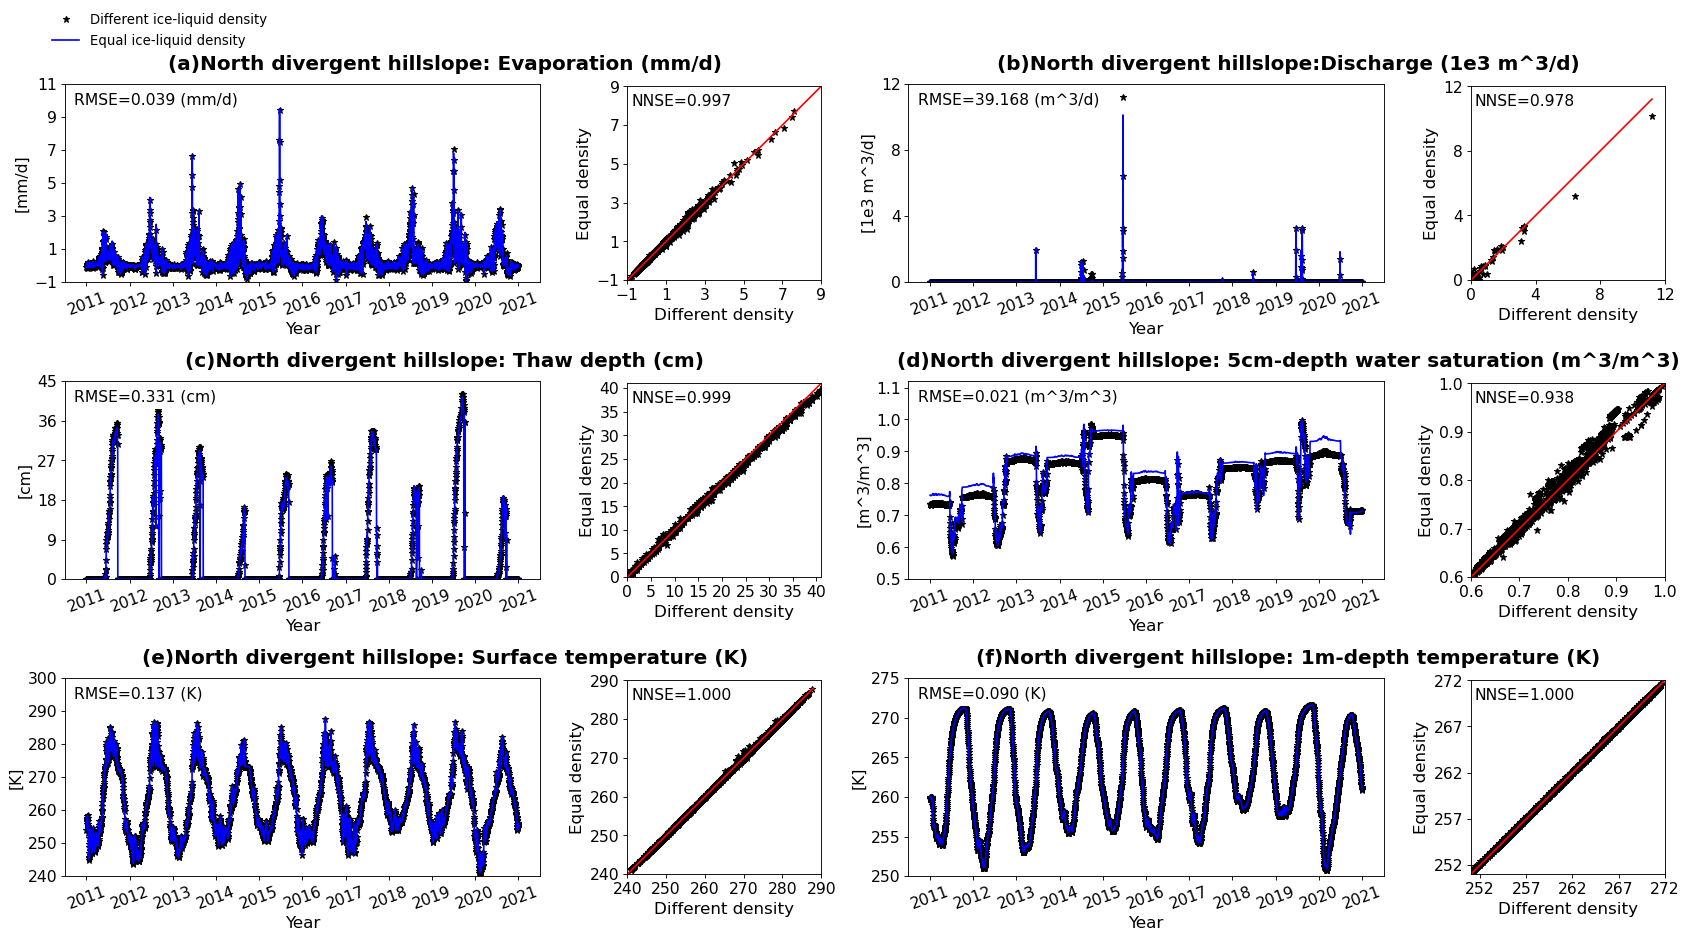

Supplement: Supplementary file 2 [file tc-16-4141-2022-supplement.zip › Barrow/density_north_divergent_barrow.png]

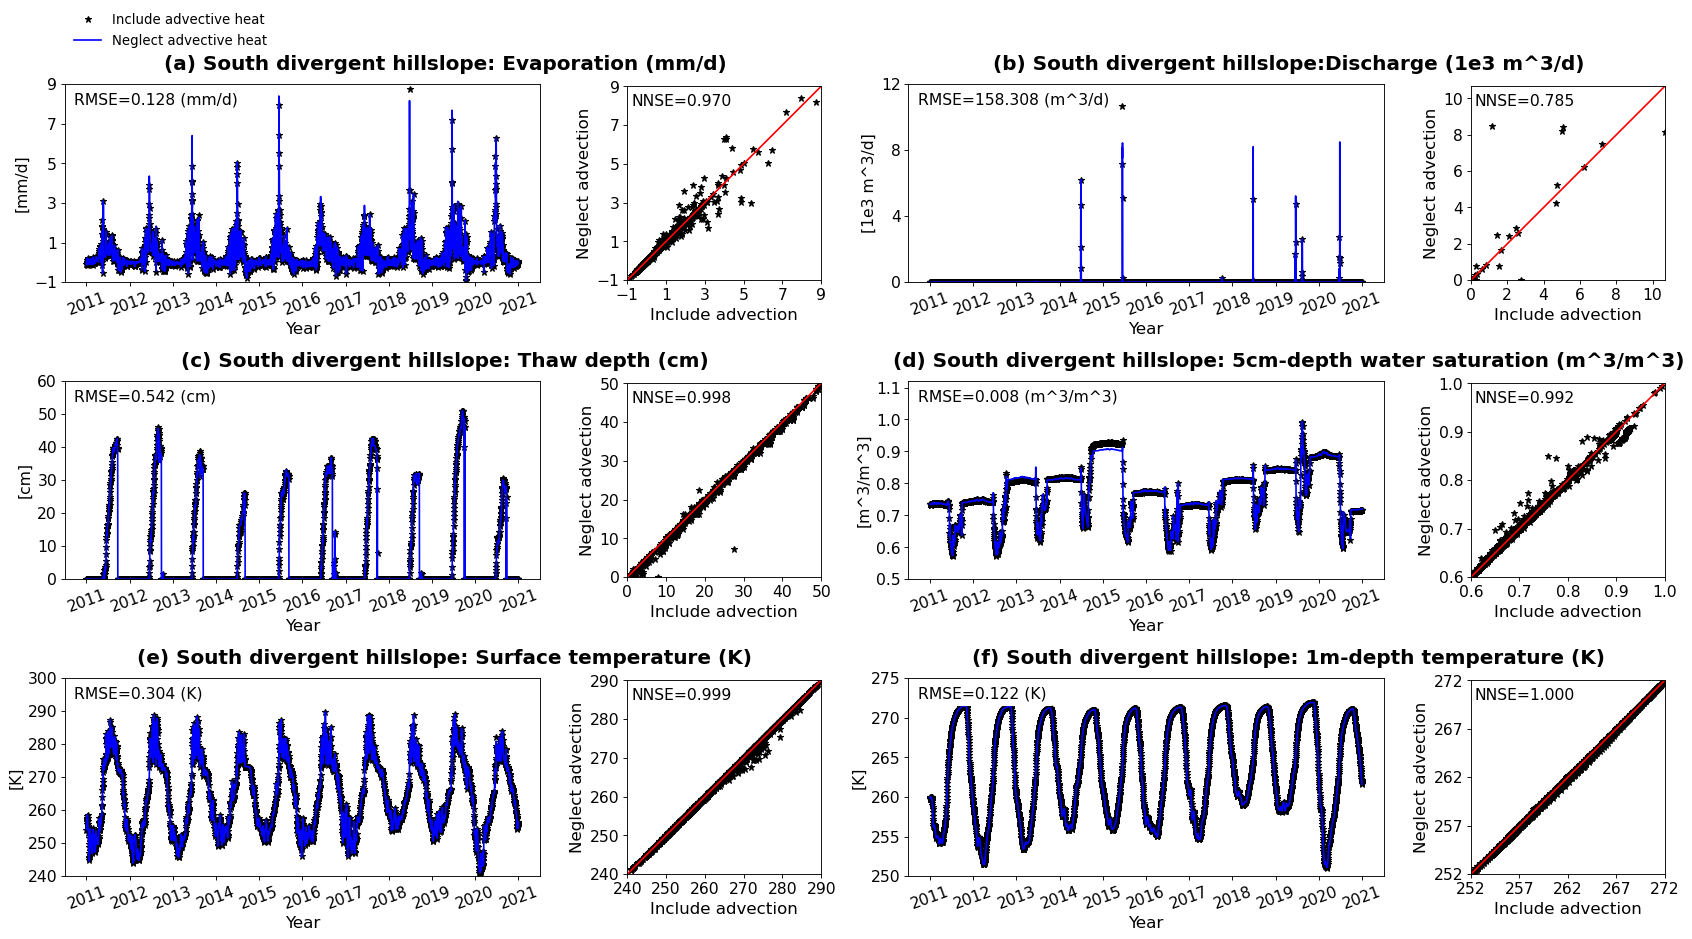

Supplement: Supplementary file 2 [file tc-16-4141-2022-supplement.zip › Barrow/advection_south_divergent_barrow.png]

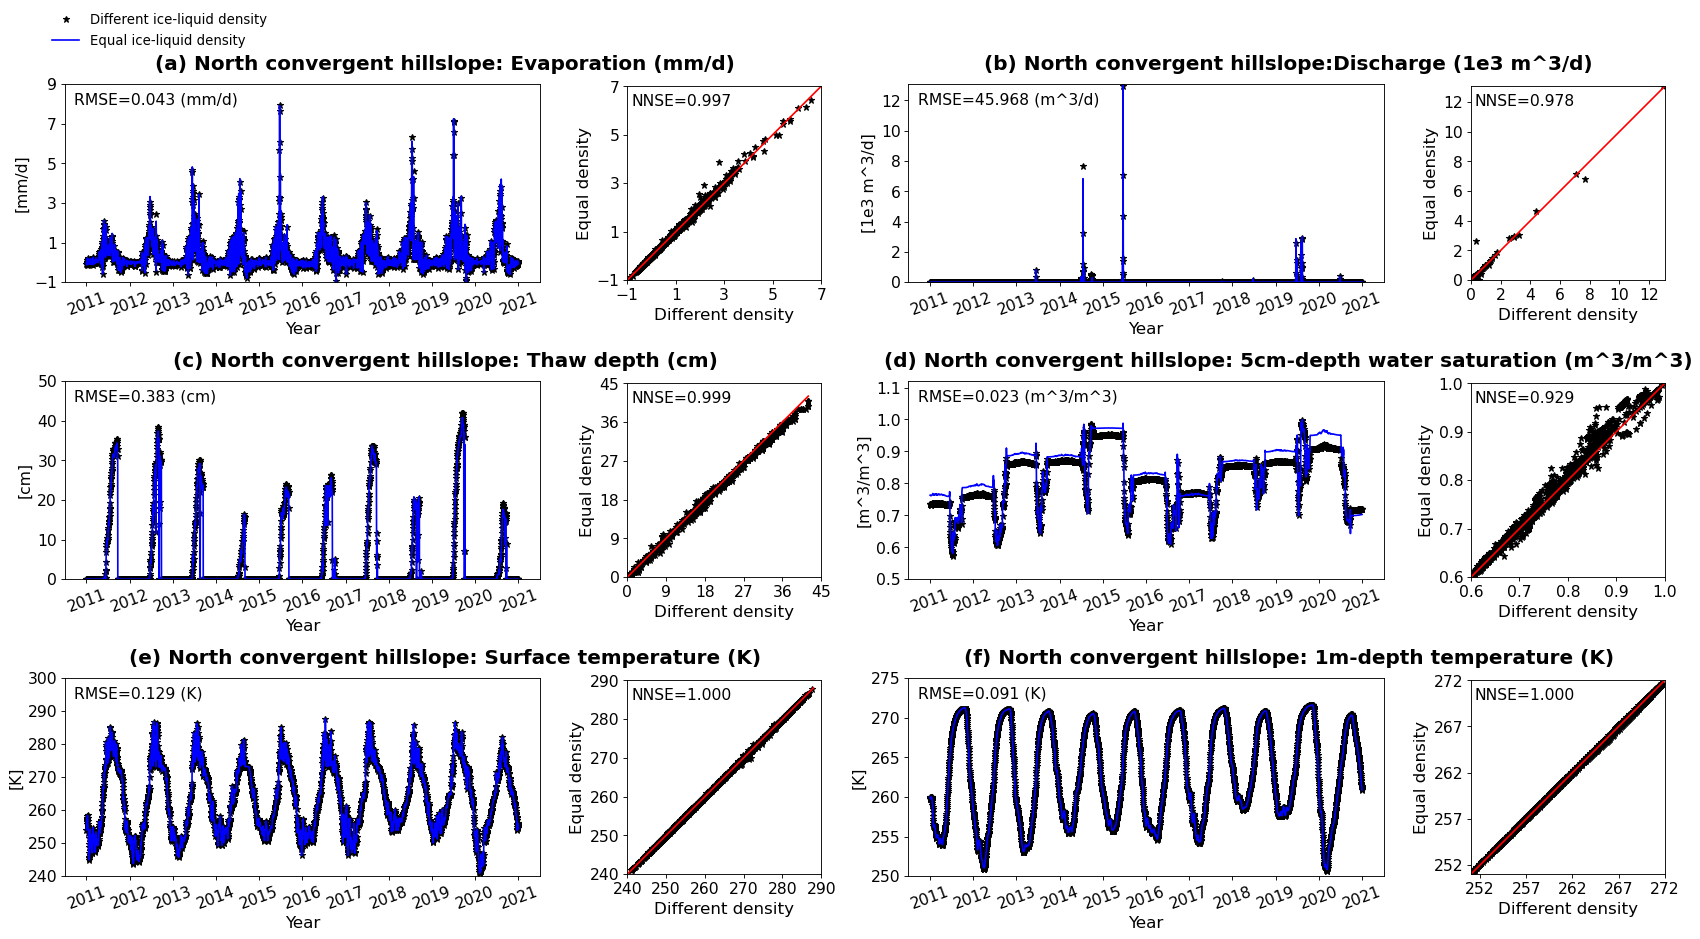

Supplement: Supplementary file 2 [file tc-16-4141-2022-supplement.zip › Barrow/density_north_convergent_barrow.png]

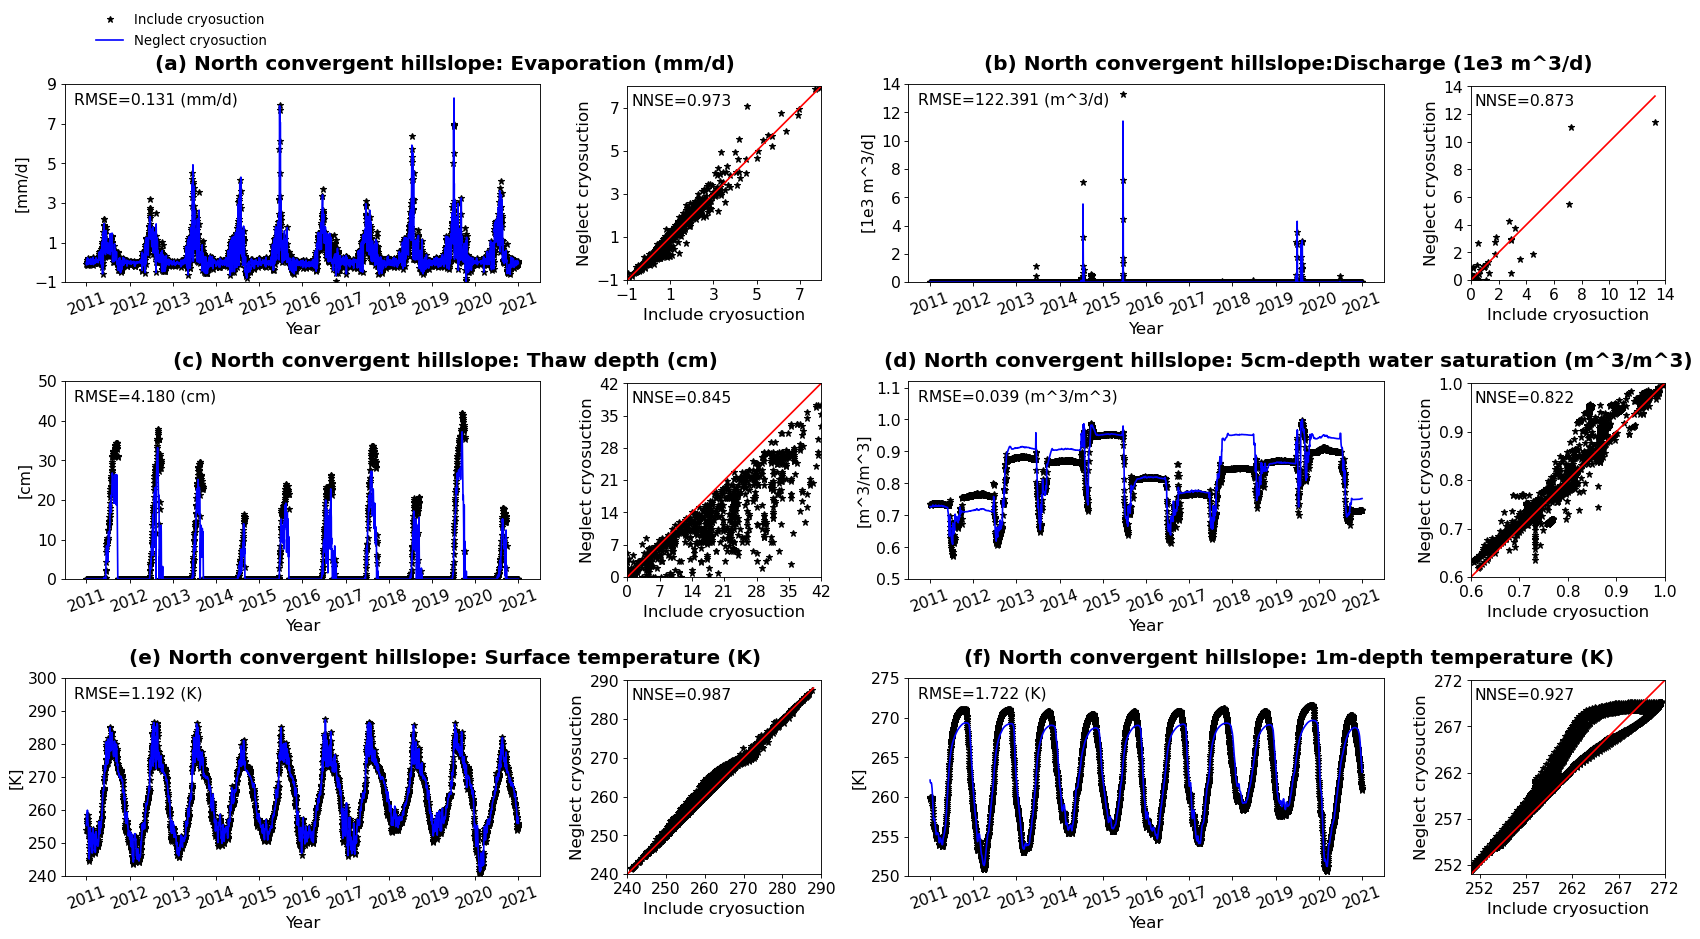

Supplement: Supplementary file 2 [file tc-16-4141-2022-supplement.zip › Barrow/cryosuction_north_convergent_barrow.png]

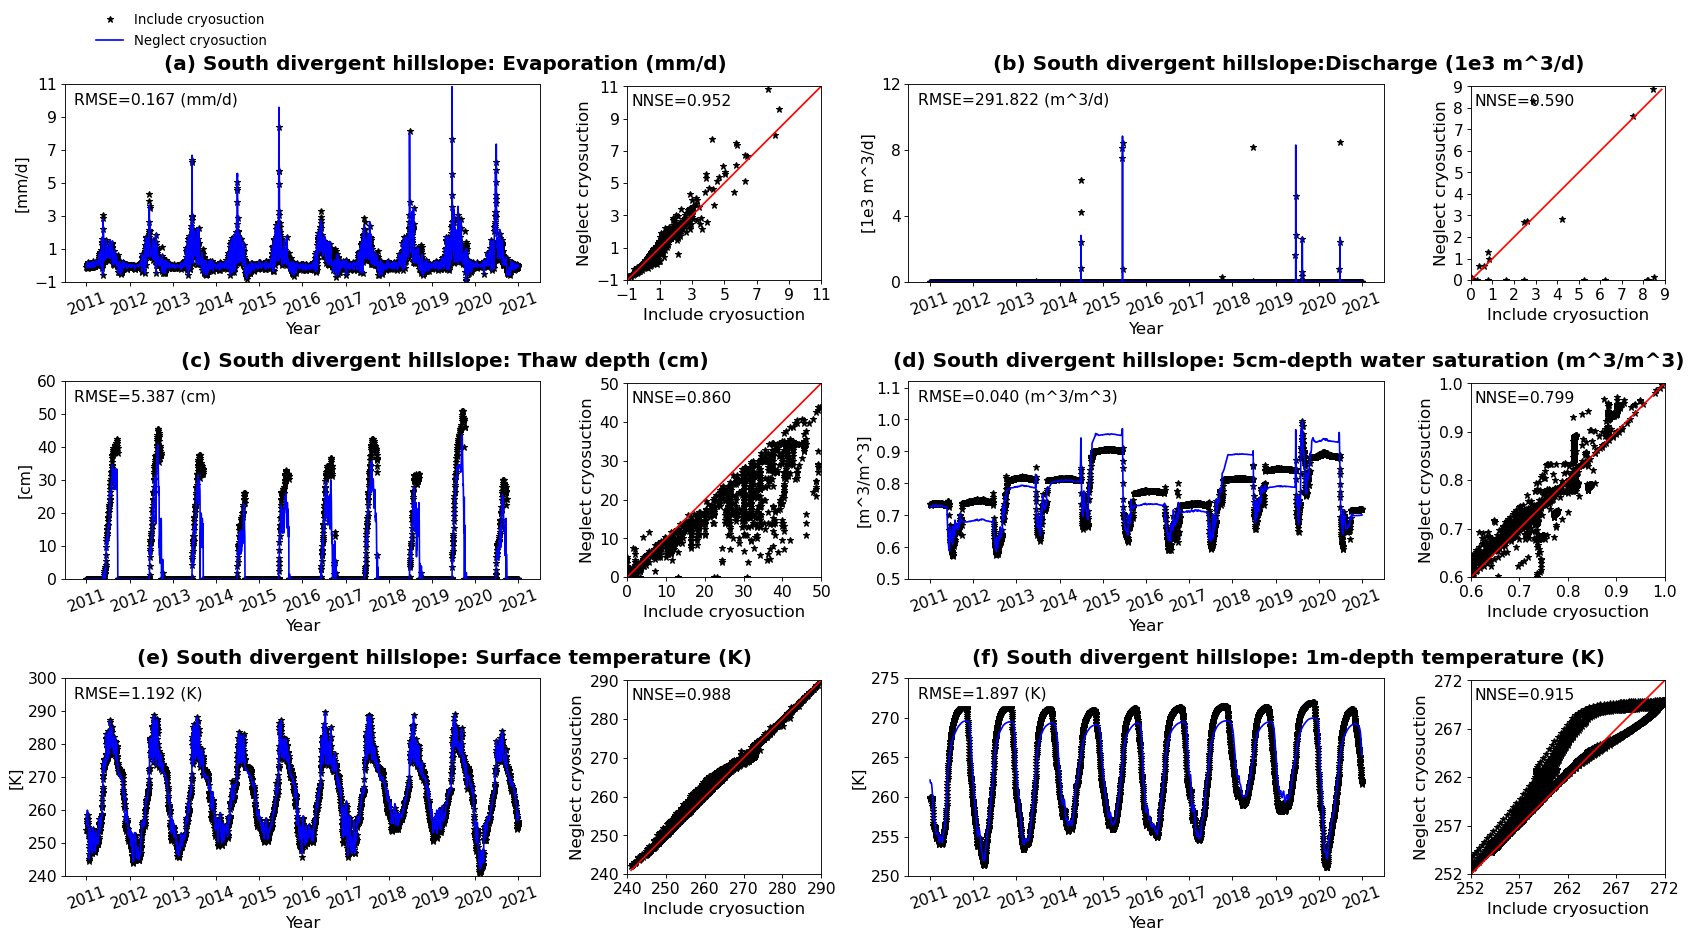

Supplement: Supplementary file 2 [file tc-16-4141-2022-supplement.zip › Barrow/cryosuction_south_divergent_barrow.png]

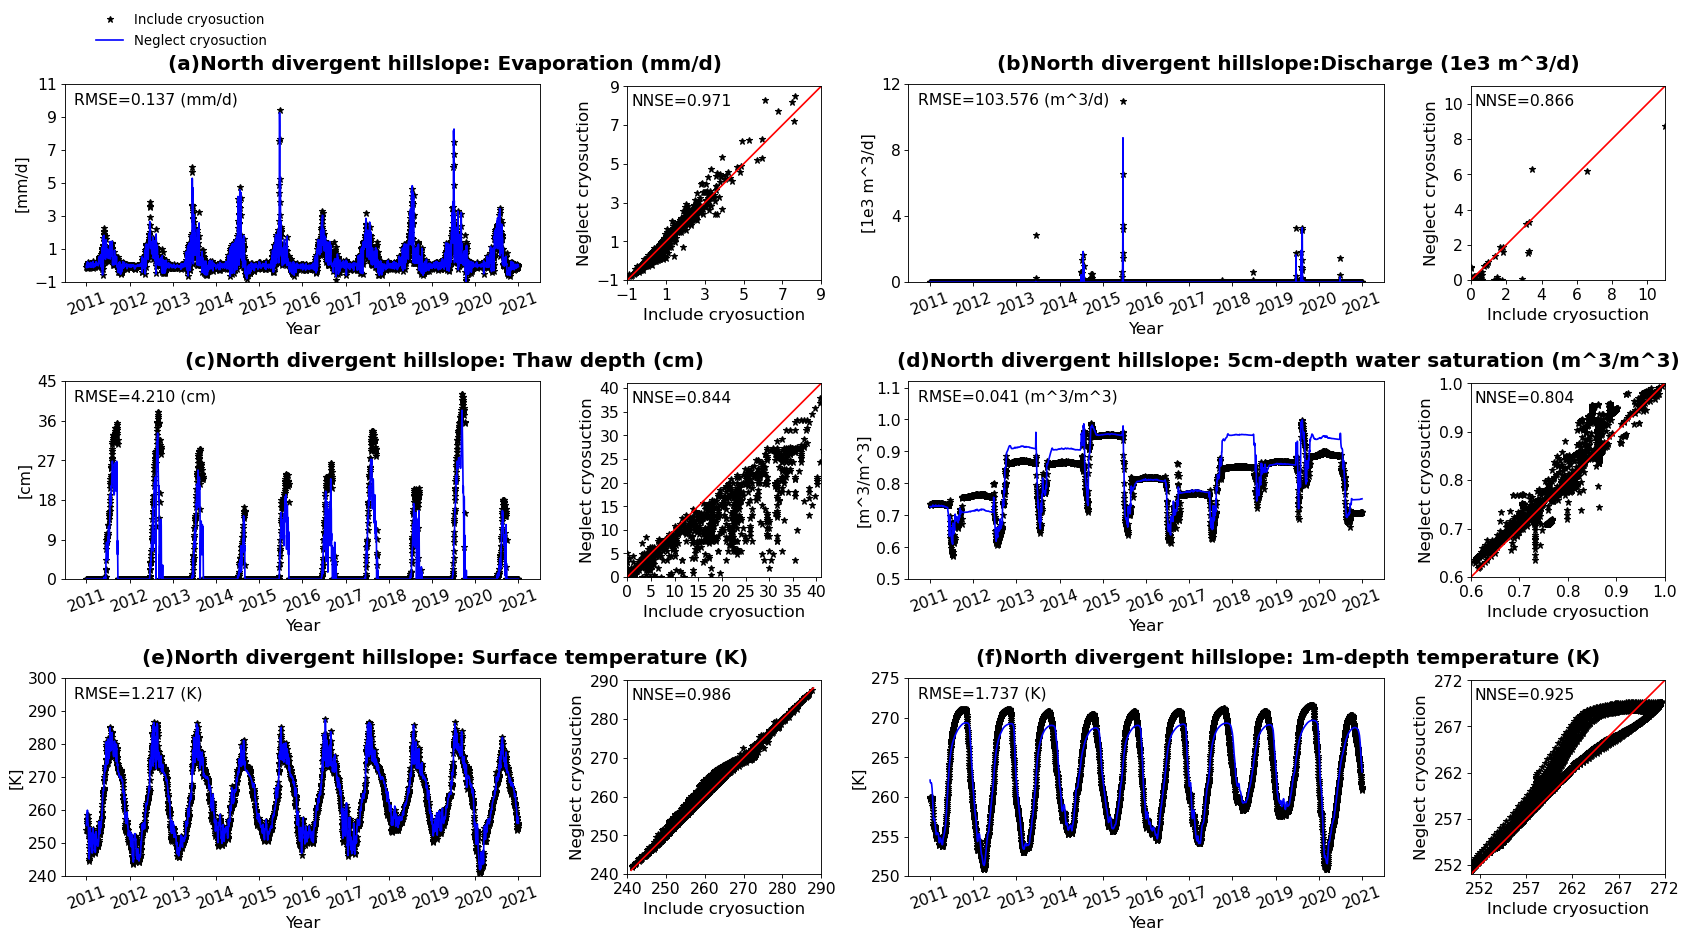

Supplement: Supplementary file 2 [file tc-16-4141-2022-supplement.zip › Barrow/cryosuction_north_divergent_barrow.png]

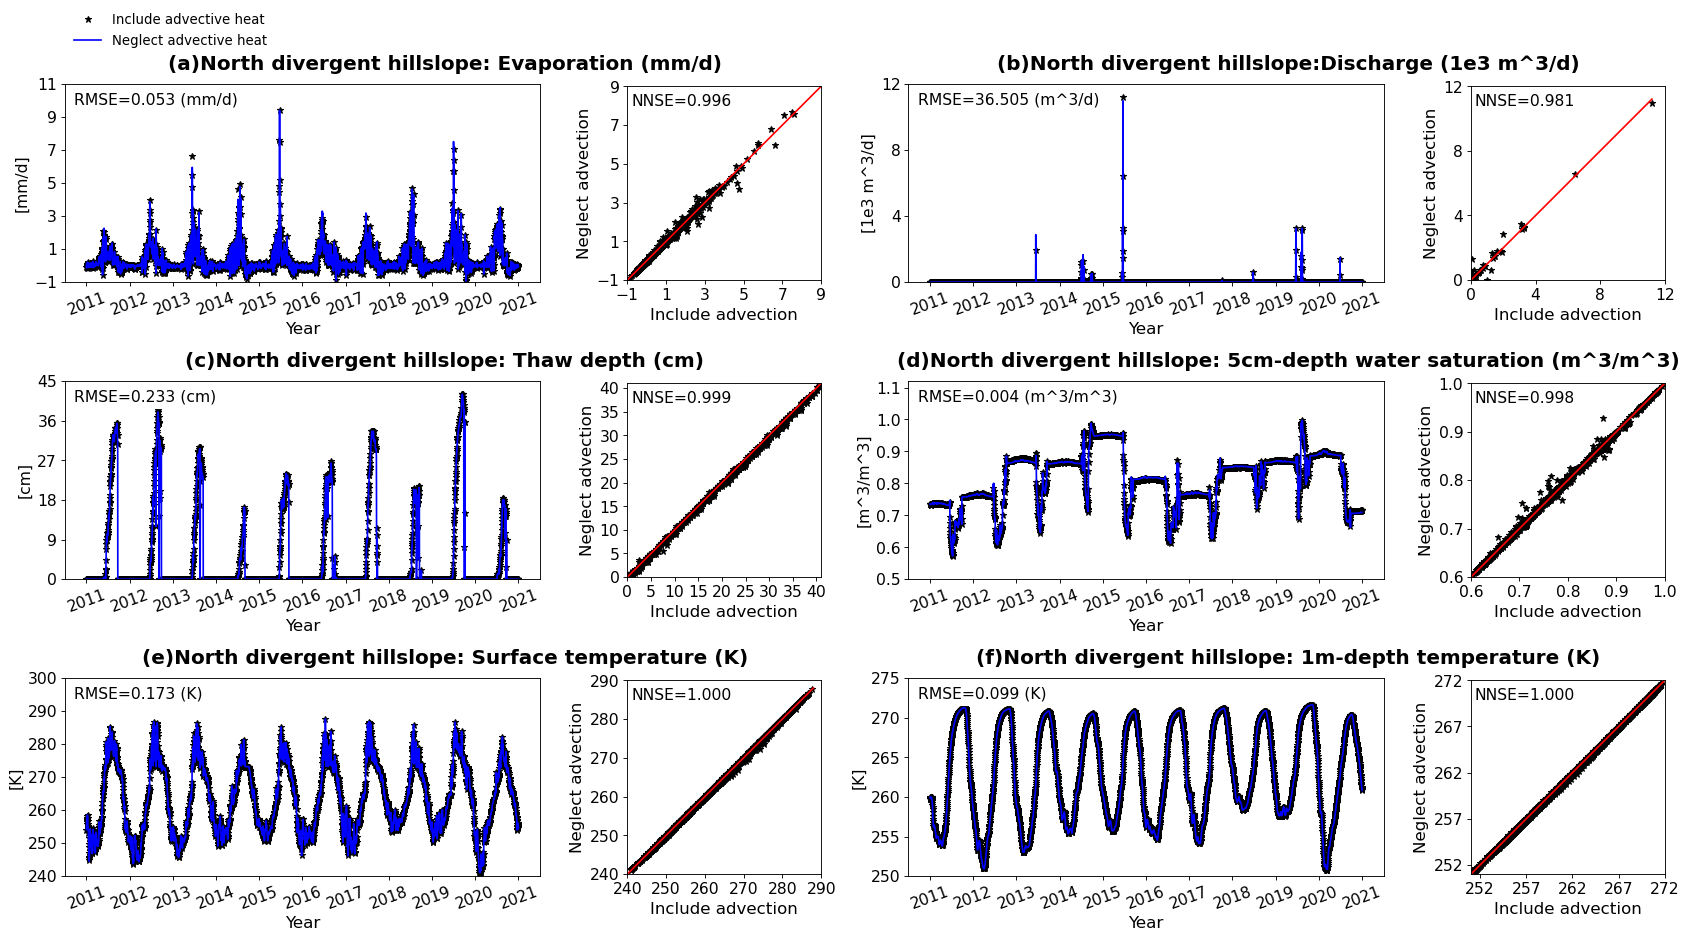

Supplement: Supplementary file 2 [file tc-16-4141-2022-supplement.zip › Barrow/advection_north_divergent_barrow.png]

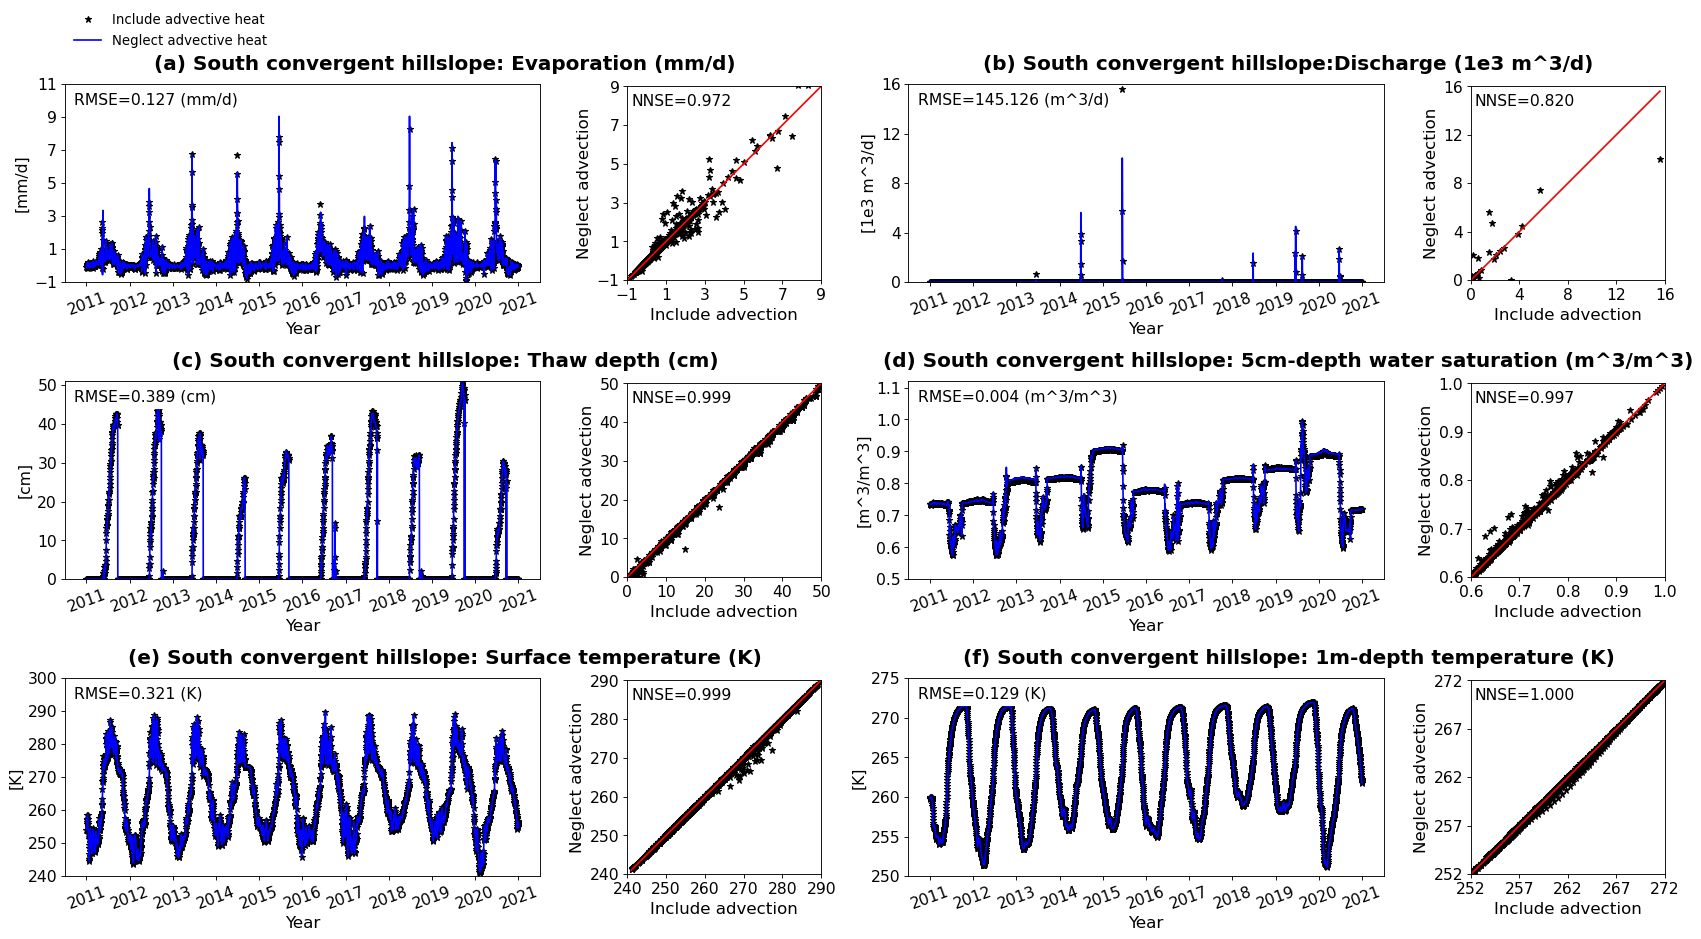

Supplement: Supplementary file 2 [file tc-16-4141-2022-supplement.zip › Barrow/advection_south_convergent_barrow.png]
